# Supplementary material
Source: Frontiers journal article supplement (https://www.frontiersin.org/articles/469340)
Supplement: Table_8.XLS [file Table_8.XLS]

## Sheet: Sheet1
Supplementary files:
Table S8. GO annotations for differentially expressed genes between Parkinson's disease and control
Significantly over-represented GO-annotations for PD and control
GO.ID	Term	Significant	Expected	BH adjusted	Gene in Term
Up-regulated biological process in PD
GO:0012501	programmed cell death	87	58.65	0.00328139	ACIN1;ACTN1;ACTN4;ADAM8;AKT1;APH1B;AREL1;ARHGEF11;ARRB2;BMX;BRCA1;C5AR1;CD59;CD74;CEBPB;CLSPN;CORO1A;DAPK2;DMPK;DNAJC5;ELMO2;FCER1G;G6PD;GAPDH;HCK;HCLS1;HSH2D;IGF2R;IKBKG;IL1RN;ILK;INPP5D;IRF1;KIF1B;LAMP1;LILRB1;MAP1S;MAP3K11;MAPK1;MKL1;MMP9;MNT;MYD88;NACC2;NAIF1;NCF1;NCOA1;NLRP12;P2RX1;PHLPP1;PLAGL2;PLAUR;PLEKHF1;POR;PPP1R15A;PRF1;PRKCD;PRKCZ;PSENEN;PSMB3;PSMD13;PTPN6;PYCARD;RAF1;RARA;RBCK1;RELA…
GO:0002218	activation of innate immune response	17	6.01	0.0036519	ADAM8;ARRB2;CNPY3;FCN1;HCK;IKBKG;IRF1;ITGAM;MAPK1;MAPKAPK2;MYD88;PGLYRP1;PYCARD;RELA;RPS6KA1;TLR4;TRAF6
GO:0006793	phosphorus metabolic process	126	92.59	0.00365802	ACP6;ADAM8;ADRA2A;AKT1;ALDOA;AMPD2;APLP2;ARRB2;ATP6V0D1;BCKDK;BCR;BMX;C5AR1;CAMK2G;CAMKK2;CD300A;CD74;CDA;CDH2;CEBPA;CLSPN;CSF1R;CSNK1D;CTDSP1;DAPK2;DGAT1;DGAT2;DGKG;DGKK;DLG3;DMPK;ELL;EPHB6;ERBB2;FES;FGR;FPR1;G6PD;GLIPR2;GMPR2;GNAI2;GRB2;H2AFY;HCK;HCLS1;HGS;HK3;IKBKG;IL1RN;ILK;INPP5D;LEMD2;MAP3K11;MAP3K3;MAPK1;MAPKAPK2;MAPRE3;MARK2;MAST3;MBOAT7;MGAT1;MMP9;MTMR14;MTMR3;MVP;NADK;NADSYN1;NDUFS2;NLR…
GO:0002532	production of molecular mediator involved in inflammatory response	7	1.15	0.00380374	ALOX5;FCER1G;IL17RA;IL4R;P2RX1;SYK;TLR4
GO:0002440	production of molecular mediator of immune response	14	4.37	0.00384811	C10orf54;CD74;FCER1G;GALNT2;HLA-E;LILRB1;PRKCZ;SASH3;SLC11A1;SUPT6H;TGFB1;TLR4;TRAF6;TREM1
GO:0051234	establishment of localization	183	144.64	0.00392395	ABCG1;ACTB;ACTN1;ACTN4;ADAM8;ADIPOR2;ADRA2A;AKT1;ALDOA;AP1M1;APOBR;ARG1;ARHGAP27;ARRB2;ARSB;ATG13;ATP6V0D1;BAP1;BCR;BEST1;CA4;CACNA1D;CAMK2G;CD209;CD300A;CD74;CFD;CLCN4;CLTB;CNTNAP1;CORO1A;CPT2;CSF1R;CSNK1D;CXCL16;CXCR1;CYBA;CYP4F2;CYTH2;DENND3;DIRC2;DNAJC5;DYSF;ELMO2;ERGIC1;FCER1G;FCGRT;FCN1;FES;FGR;FLOT2;GAB2;GNAI2;GRB2;H2AFY;HCK;HCLS1;HGS;HK3;HLA-E;IGF2R;IKBKG;IL1RN;IL4R;INSC;KATNB1;KCNMB1;KIF…
GO:0042090	interleukin-12 biosynthetic process	4	0.3	0.00399114	IRF1;RELA;TLR4;TRAF6
GO:0045075	regulation of interleukin-12 biosynthetic process	4	0.3	0.00399114	IRF1;RELA;TLR4;TRAF6
GO:0042130	negative regulation of T cell proliferation	8	1.54	0.00407799	C10orf54;CEBPB;ERBB2;HLA-G;LILRB1;LILRB2;PTPN6;TGFB1
GO:0006464	cellular protein modification process	138	103.61	0.00413687	ADAM8;ADRA2A;AKT1;APLP2;AREL1;ARRB2;ARSB;ASB6;ATP6V0D1;BAP1;BCKDK;BCR;BMX;BRCA1;C5AR1;CAMK2G;CAMKK2;CD300A;CD74;CEBPA;CFP;CLSPN;CSF1R;CSNK1D;CTDSP1;DAPK2;DCAF15;DMPK;ENC1;EPHB6;ERBB2;FES;FGR;FKBP9;FPR1;G6PD;GALNT2;GAPDH;GNAI2;H2AFY;HCK;HCLS1;HGS;IKBKG;IL1RN;ILK;JARID2;JDP2;KCTD13;KDM1B;KDM6B;KLHL21;KMT2D;MAN2A2;MAP3K11;MAP3K3;MAPK1;MAPKAPK2;MAPRE3;MARK2;MAST3;MGAT1;MGRN1;MMP9;MTMR14;MTMR3;MVP;NAC…
GO:0036211	protein modification process	138	103.61	0.00413687	ADAM8;ADRA2A;AKT1;APLP2;AREL1;ARRB2;ARSB;ASB6;ATP6V0D1;BAP1;BCKDK;BCR;BMX;BRCA1;C5AR1;CAMK2G;CAMKK2;CD300A;CD74;CEBPA;CFP;CLSPN;CSF1R;CSNK1D;CTDSP1;DAPK2;DCAF15;DMPK;ENC1;EPHB6;ERBB2;FES;FGR;FKBP9;FPR1;G6PD;GALNT2;GAPDH;GNAI2;H2AFY;HCK;HCLS1;HGS;IKBKG;IL1RN;ILK;JARID2;JDP2;KCTD13;KDM1B;KDM6B;KLHL21;KMT2D;MAN2A2;MAP3K11;MAP3K3;MAPK1;MAPKAPK2;MAPRE3;MARK2;MAST3;MGAT1;MGRN1;MMP9;MTMR14;MTMR3;MVP;NAC…
GO:1902563	regulation of neutrophil activation	3	0.13	0.00422844	BCR;CD300A;SYK
GO:0043549	regulation of kinase activity	45	25.34	0.00422844	ADAM8;ADRA2A;AKT1;APLP2;ATP6V0D1;C5AR1;CAMKK2;CD300A;CD74;CEBPA;CLSPN;CSF1R;ERBB2;FGR;FPR1;GNAI2;H2AFY;HGS;IKBKG;IL1RN;ILK;MAP3K11;MAP3K3;MAPK1;MAPKAPK2;MAPRE3;MARK2;MVP;PRKACA;PRKCD;PRKCZ;PTPN6;PXN;PYCARD;RAF1;RARA;RGS3;SLC11A1;SLC9A3R1;SYK;TGFB1;TLR4;TRAF6;TTN;VAV3
GO:0002460	adaptive immune response based on somatic recombination of immune receptors built from immunoglobulin superfamily domains	19	7.29	0.00422844	C10orf54;CD74;FCER1G;HLA-B;HLA-C;HLA-E;HLA-F;HLA-G;IL4R;LILRB1;PRKCD;PRKCZ;PTPN6;SASH3;SLC11A1;SUPT6H;TGFB1;TLR4;TRAF6
GO:0045089	positive regulation of innate immune response	19	7.29	0.00422844	ADAM8;ARRB2;CNPY3;FCN1;HCK;HLA-E;IKBKG;IRF1;ITGAM;LAMP1;MAPK1;MAPKAPK2;MYD88;PGLYRP1;PYCARD;RELA;RPS6KA1;TLR4;TRAF6
GO:0071310	cellular response to organic substance	91	62.55	0.00424214	ADIPOR2;ADRA2A;AKT1;APH1B;ARG1;ARHGEF11;ARRB2;ATP6V0D1;BRCA1;CAMK2G;CD74;CEBPA;CEBPB;CORO1A;CSF1R;CSF3R;CXCL16;CXCR1;CYBA;DGAT2;ERBB2;FGR;FOSL2;GAPDH;GNB2;GNG2;GRB2;HCK;HCLS1;HLA-B;HLA-C;HLA-E;HLA-F;HLA-G;IFITM2;IFITM3;IL17RA;IL1RN;IL4R;IRF1;JUND;LILRB1;LILRB2;MAPK1;MAPKAPK2;MX2;MYD88;NCAM1;NCOA1;NLRP12;NR1H2;NUP214;PDK3;PFN1;PHLPP1;POR;PPP1R15A;PRKACA;PRKCD;PRKCZ;PRKD2;PSAP;PSENEN;PTPN6;PXN;PYCA…
GO:0045859	regulation of protein kinase activity	43	23.86	0.00430205	ADAM8;ADRA2A;AKT1;APLP2;ATP6V0D1;C5AR1;CAMKK2;CD300A;CD74;CEBPA;CLSPN;CSF1R;ERBB2;FGR;FPR1;GNAI2;H2AFY;HGS;IKBKG;IL1RN;ILK;MAP3K11;MAP3K3;MAPK1;MAPKAPK2;MAPRE3;MARK2;MVP;PRKACA;PRKCD;PRKCZ;PTPN6;PXN;PYCARD;RAF1;RGS3;SLC11A1;SLC9A3R1;SYK;TGFB1;TLR4;TRAF6;TTN
GO:1903034	regulation of response to wounding	26	11.78	0.00441191	ADAM8;ADRA2A;BCR;CD59;CFP;CYP4F2;FCER1G;HCK;HPSE;IL17RA;METRNL;MYD88;NLRP12;PGLYRP1;PLAUR;PRKCD;PYCARD;RELA;S100A9;SBNO2;SYK;THBD;TLR4;TNFRSF1A;TNFRSF1B;ZYX
GO:0001932	regulation of protein phosphorylation	56	33.9	0.0044467	ADAM8;ADRA2A;AKT1;APLP2;ARRB2;ATP6V0D1;C5AR1;CAMKK2;CD300A;CD74;CEBPA;CLSPN;CSF1R;CSNK1D;CTDSP1;ERBB2;FGR;FPR1;GNAI2;H2AFY;HCLS1;HGS;IKBKG;IL1RN;ILK;MAP3K11;MAP3K3;MAPK1;MAPKAPK2;MAPRE3;MARK2;MMP9;MVP;NLRP12;PLAUR;PLXNB2;PPP1R15A;PRKACA;PRKCD;PRKCZ;PRKD2;PTPN6;PXN;PYCARD;RAF1;RGS3;ROPN1L;SLC11A1;SLC9A3R1;SYK;TADA3;TGFB1;TLR4;TNFRSF1A;TRAF6;TTN
GO:0043406	positive regulation of MAP kinase activity	18	6.73	0.00449673	ADAM8;ADRA2A;C5AR1;CD74;ERBB2;FPR1;IKBKG;IL1RN;ILK;MAP3K11;MAP3K3;MAPK1;MAPKAPK2;PXN;SYK;TGFB1;TLR4;TRAF6
GO:0090382	phagosome maturation	8	1.58	0.00457651	ATP6V0D1;CORO1A;CYBA;NCF1;NCF4;RAB43;SLC11A1;TCIRG1
GO:1902107	positive regulation of leukocyte differentiation	13	3.94	0.00472987	ACIN1;ADAM8;CD101;CD74;HCLS1;HLA-G;IL4R;LILRB2;PRKCZ;RARA;SASH3;SYK;TRAF6
GO:0008283	cell proliferation	88	60.26	0.00476993	ADRA2A;AKT1;ARG1;BAP1;BMX;BRCA1;C10orf54;C5AR1;CAPN1;CBFA2T3;CD209;CD300A;CD59;CD74;CEBPA;CEBPB;CORO1A;CSF1R;CYBA;DLG3;ERBB2;FES;FGR;FOSL2;GAB2;GNAI2;GNG2;GRN;HCK;HCLS1;HGS;HLA-E;HLA-G;HPSE;IFT80;IL4R;ILK;IRF1;ITGAM;JARID2;JUND;KLF13;KMT2D;LILRB1;LILRB2;LST1;MAP3K11;MAPK1;MNT;MVP;NACC2;NCF1;PELO;PLXNB2;POR;PRKCD;PRKCZ;PRKD2;PRMT5;PTPN6;PYCARD;RAC2;RAF1;RARA;RASGRP4;RELA;RHOG;RPS6KA1;S100A11;S100A…
GO:0002479	antigen processing and presentation of exogenous peptide antigen via MHC class I, TAP-dependent	10	2.46	0.00486546	CYBA;HLA-B;HLA-C;HLA-E;HLA-F;HLA-G;NCF1;NCF4;PSMB3;PSMD13
GO:0038127	ERBB signaling pathway	20	8.01	0.00494117	ADRA2A;AKT1;APLP2;ERBB2;FES;GRB2;HGS;MAPK1;MMP9;MVB12A;MVP;PHLPP1;PLAUR;PRKACA;PRKCD;PXN;RAF1;REPS2;TGFB1;VAV1
GO:0032753	positive regulation of interleukin-4 production	5	0.56	0.00494117	CEBPB;HLA-E;PRKCZ;RARA;SASH3
GO:0043302	positive regulation of leukocyte degranulation	5	0.56	0.00494117	FCER1G;FGR;GAB2;LAMP1;SYK
GO:0032268	regulation of cellular protein metabolic process	93	64.66	0.00509649	ADAM8;ADRA2A;AKT1;APLP2;ARRB2;ATP6V0D1;BRCA1;C5AR1;CAMKK2;CD300A;CD74;CEBPA;CIRBP;CLSPN;CSF1R;CSNK1D;CST3;CST4;CST7;CTDSP1;ENC1;ERBB2;FGR;FPR1;G6PD;GAPDH;GNAI2;H2AFY;HCLS1;HGS;IKBKG;IL1RN;ILK;JARID2;JDP2;MAP3K11;MAP3K3;MAPK1;MAPKAPK2;MAPRE3;MARK2;MKL1;MMP9;MTG2;MVP;NLRP12;NR1H2;P2RX1;PLAUR;PLXNB2;POR;PPP1R15A;PRKACA;PRKCD;PRKCZ;PRKD2;PSMB3;PSMD13;PTPN6;PXN;PYCARD;QKI;RAF1;RARA;RENBP;RGS3;RNF40;RO…
GO:0042742	defense response to bacterium	18	6.83	0.00523689	C5AR1;CFP;FCER1G;FGR;GNLY;HLA-E;MYD88;MYO1F;NCF1;PGLYRP1;PRKCD;PYCARD;S100A9;SLC11A1;SYK;TLR4;TNFRSF1A;TREM1
GO:0032269	negative regulation of cellular protein metabolic process	45	25.63	0.00523689	AKT1;APLP2;ARRB2;BRCA1;CD300A;CEBPA;CIRBP;CST3;CST4;CST7;CTDSP1;ENC1;G6PD;GAPDH;H2AFY;ILK;JARID2;MKL1;MMP9;MVP;NLRP12;NR1H2;PLAUR;POR;PPP1R15A;PRKCD;PRKCZ;PSMB3;PSMD13;PTPN6;PYCARD;RAF1;RARA;RENBP;RGS3;RPS6KA1;SERPINA1;SLPI;SPI1;SPINT1;SUPT6H;TGFB1;TIMP2;TNFSF14;TRIM21
GO:0044699	single-organism process	463	431.52	0.00556608	ABCG1;ABHD2;ACIN1;ACP6;ACTB;ACTN1;ACTN4;ADAM23;ADAM8;ADAMTS2;ADGRE2;ADGRE5;ADGRG3;ADIPOR2;ADRA2A;AGTRAP;AKT1;ALDOA;ALOX5;AMPD2;AP1M1;APH1B;APLP2;APOBR;ARAP1;AREL1;ARG1;ARHGAP26;ARHGAP27;ARHGAP30;ARHGAP9;ARHGEF11;ARHGEF40;ARRB2;ARSB;ASB6;ATG13;ATG2A;ATP6V0D1;BAP1;BASP1;BCKDK;BCR;BEST1;BMX;BNC2;BRCA1;C10orf54;C5AR1;CA4;CABLES2;CACNA1D;CAMK2G;CAMKK2;CANT1;CAPN1;CBFA2T3;CD101;CD209;CD300A;CD59;CD74;C…
GO:0031399	regulation of protein modification process	67	43.09	0.00556608	ADAM8;ADRA2A;AKT1;APLP2;ARRB2;ATP6V0D1;BRCA1;C5AR1;CAMKK2;CD300A;CD74;CEBPA;CLSPN;CSF1R;CSNK1D;CTDSP1;ERBB2;FGR;FPR1;G6PD;GNAI2;H2AFY;HCLS1;HGS;IKBKG;IL1RN;ILK;JARID2;JDP2;MAP3K11;MAP3K3;MAPK1;MAPKAPK2;MAPRE3;MARK2;MMP9;MVP;NLRP12;PLAUR;PLXNB2;PPP1R15A;PRKACA;PRKCD;PRKCZ;PRKD2;PSMB3;PSMD13;PTPN6;PXN;PYCARD;RAF1;RGS3;RNF40;ROPN1L;RTF1;SLC11A1;SLC9A3R1;SPI1;SUPT6H;SYK;TADA3;TGFB1;TLR4;TNFRSF1A;TRAF…
GO:0001914	regulation of T cell mediated cytotoxicity	6	0.89	0.00578534	HLA-B;HLA-C;HLA-E;HLA-F;HLA-G;LILRB1
GO:0042269	regulation of natural killer cell mediated cytotoxicity	6	0.89	0.00578534	ARRB2;HLA-B;HLA-E;LAMP1;LILRB1;NCR1
GO:0045595	regulation of cell differentiation	70	45.62	0.00578534	ABCG1;ACIN1;ADAM8;AKT1;ARSB;C10orf54;CD101;CD74;CDH2;CEBPA;CEBPB;CTDSP1;DMPK;ENC1;ERBB2;FES;GLIPR2;H2AFY;HCLS1;HLA-B;HLA-G;IL4R;ILK;IRF1;JDP2;JUND;KATNB1;KLF13;LILRB1;LILRB2;LILRB3;LMO4;MAPK1;MARK2;METRNL;NCOA1;NFAM1;NR1H2;PDLIM7;PGLYRP1;PLXNB2;POR;PREX1;PRKACA;PRKCZ;PTPN6;RAF1;RARA;RELA;RPS6KA1;RTF1;SASH3;SETX;SPEN;SPI1;SSH1;SSH2;SUPT6H;SYK;TFE3;TGFB1;TIMP2;TLR4;TNFSF14;TRAF6;TSHZ3;TWIST2;TYROBP…
GO:1902106	negative regulation of leukocyte differentiation	10	2.53	0.00585523	CD74;ERBB2;HLA-G;IL4R;IRF1;LILRB1;LILRB3;PGLYRP1;RARA;TLR4
GO:2001179	regulation of interleukin-10 secretion	4	0.33	0.00592021	LILRB1;PRKCZ;PYCARD;TNFRSF9
GO:0000187	activation of MAPK activity	14	4.59	0.0059904	ADAM8;ADRA2A;C5AR1;CD74;FPR1;IKBKG;MAP3K11;MAP3K3;MAPK1;MAPKAPK2;PXN;SYK;TLR4;TRAF6
GO:0065008	regulation of biological quality	139	105.68	0.00633389	ABCG1;ACIN1;ACTB;ACTN1;ACTN4;ADAM8;ADRA2A;AGTRAP;AKT1;ALDOA;AMPD2;APLP2;ARAP1;ARRB2;ATP6V0D1;C5AR1;CACNA1D;CAMK2G;CD209;CD59;CD74;CDC42EP4;CEACAM1;CEBPA;CFD;CIRBP;CORO1A;CSF1R;CSNK1D;CST4;CYBA;CYP4F2;DGAT1;DGAT2;DGKG;DGKK;DMPK;DNAJC5;FCER1G;FES;FGR;FLOT2;FMNL1;G6PD;GAPDH;GAS7;GNAI2;GNG2;GNLY;GRB2;HCK;HCLS1;HK3;HPSE;HSD17B1;HSH2D;IKBKG;IL1RN;ILK;INPP5D;IRF1;ITGAM;KCNMB1;KLF13;LAMP1;LAMP2;LST1;MAPK…
GO:0044255	cellular lipid metabolic process	51	30.52	0.00633389	ABCG1;ACP6;ADIPOR2;AKT1;ALOX5;APOBR;ARSB;BRCA1;CD74;CPT2;CSF1R;CYP4F2;DGAT1;DGAT2;DGKK;FGR;HELZ2;INPP5D;MAPKAPK2;MBOAT7;MID1IP1;MTMR14;MTMR3;NAGA;NCF1;NCOA1;NEU1;NFYC;NR1H2;P2RX1;PCYT1A;PDK3;PLAUR;PLBD1;POR;PRKACA;PRKCD;PSAP;PTGDS;QKI;RARA;SGPL1;SLC25A20;SLC27A3;SLC44A2;SPTLC2;SYK;TBXAS1;TGFB1;TNFRSF1A;VAV3
GO:0045582	positive regulation of T cell differentiation	9	2.1	0.00647982	ADAM8;CD74;HLA-G;IL4R;LILRB2;PRKCZ;RARA;SASH3;SYK
GO:0002758	innate immune response-activating signal transduction	16	5.78	0.00651913	ADAM8;ARRB2;CNPY3;FCN1;HCK;IKBKG;IRF1;ITGAM;MAPK1;MAPKAPK2;MYD88;PGLYRP1;RELA;RPS6KA1;TLR4;TRAF6
GO:0051046	regulation of secretion	37	19.95	0.00666899	ADAM8;ADRA2A;BCR;CACNA1D;CD300A;CD74;CSF1R;CYBA;CYP4F2;FCER1G;FCN1;FES;FGR;GAB2;HGS;HLA-E;IL1RN;IL4R;LAMP1;LILRB1;MARCKS;NLRP12;NR1H2;PRKACA;PRKCZ;PYCARD;RAB11FIP1;RAB37;RAB3D;RHBDF2;S100A9;SLC9A3R1;SYK;TGFB1;TLR4;TNFRSF9;TRAF6
GO:0071222	cellular response to lipopolysaccharide	13	4.1	0.00666899	ARG1;CXCL16;HCK;LILRB1;LILRB2;MAPK1;PYCARD;RARA;RELA;TGFB1;TLR4;TNFRSF1B;TRAF6
GO:0071902	positive regulation of protein serine/threonine kinase activity	21	8.86	0.00668679	ADAM8;ADRA2A;AKT1;C5AR1;CD74;CSF1R;ERBB2;FPR1;IKBKG;IL1RN;ILK;MAP3K11;MAP3K3;MAPK1;MAPKAPK2;MAPRE3;PXN;SYK;TGFB1;TLR4;TRAF6
GO:0002279	mast cell activation involved in immune response	7	1.28	0.00678174	CD300A;FCER1G;FES;FGR;GAB2;LAT2;SYK
GO:0043303	mast cell degranulation	7	1.28	0.00678174	CD300A;FCER1G;FES;FGR;GAB2;LAT2;SYK
GO:0097028	dendritic cell differentiation	7	1.28	0.00678174	HLA-B;HLA-G;LILRB1;LILRB2;SPI1;TGFB1;TRAF6
GO:0071900	regulation of protein serine/threonine kinase activity	29	14.24	0.0067827	ADAM8;ADRA2A;AKT1;C5AR1;CD300A;CD74;CEBPA;CSF1R;ERBB2;FPR1;H2AFY;HGS;IKBKG;IL1RN;ILK;MAP3K11;MAP3K3;MAPK1;MAPKAPK2;MAPRE3;PRKCD;PTPN6;PXN;PYCARD;RGS3;SYK;TGFB1;TLR4;TRAF6
GO:0002707	negative regulation of lymphocyte mediated immunity	6	0.92	0.00680791	ARRB2;C10orf54;HLA-B;HLA-E;LILRB1;PTPN6
GO:0002715	regulation of natural killer cell mediated immunity	6	0.92	0.00680791	ARRB2;HLA-B;HLA-E;LAMP1;LILRB1;NCR1
GO:0002720	positive regulation of cytokine production involved in immune response	6	0.92	0.00680791	CD74;FCER1G;PRKCZ;SASH3;TLR4;TRAF6
GO:0031348	negative regulation of defense response	13	4.14	0.00703383	ARRB2;BCR;HLA-B;HLA-E;LILRB1;METRNL;NLRP12;NR1H2;PGLYRP1;PRKCD;TNFRSF1A;TNFRSF1B;TRAFD1
GO:0045597	positive regulation of cell differentiation	42	23.79	0.0071572	ACIN1;ADAM8;AKT1;ARSB;C10orf54;CD101;CD74;CDH2;CEBPA;CEBPB;ENC1;FES;GLIPR2;H2AFY;HCLS1;HLA-G;IL4R;ILK;JUND;KATNB1;LILRB2;MARK2;METRNL;NCOA1;PDLIM7;PLXNB2;POR;PREX1;PRKCZ;RARA;RELA;RPS6KA1;SASH3;SETX;SPEN;SYK;TGFB1;TIMP2;TNFSF14;TRAF6;TSHZ3;VDR
GO:0050727	regulation of inflammatory response	20	8.3	0.0073406	ADAM8;BCR;CD59;CFP;FCER1G;HCK;IL17RA;METRNL;MYD88;NLRP12;PGLYRP1;PRKCD;PYCARD;RELA;S100A9;SBNO2;TLR4;TNFRSF1A;TNFRSF1B;ZYX
GO:0060627	regulation of vesicle-mediated transport	25	11.59	0.00740175	ACTN4;ADRA2A;ARRB2;BCR;CD300A;CORO1A;FCER1G;FES;FGR;GAB2;HCK;HGS;LAMP1;LILRB1;MAPK1;MVB12A;NR1H2;PYCARD;RAB37;RAB3D;SLC11A1;SYK;TGFB1;VPS18;VPS37B
GO:0032653	regulation of interleukin-10 production	7	1.31	0.00778855	FCER1G;LILRB1;PRKCZ;PYCARD;SASH3;TLR4;TNFRSF9
GO:0006810	transport	177	141.22	0.0077977	ABCG1;ACTB;ACTN1;ACTN4;ADAM8;ADIPOR2;ADRA2A;AKT1;ALDOA;AP1M1;APOBR;ARG1;ARHGAP27;ARRB2;ARSB;ATG13;ATP6V0D1;BAP1;BCR;BEST1;CA4;CACNA1D;CAMK2G;CD209;CD300A;CD74;CFD;CLCN4;CLTB;CNTNAP1;CORO1A;CPT2;CSF1R;CSNK1D;CXCL16;CXCR1;CYBA;CYP4F2;CYTH2;DENND3;DIRC2;DNAJC5;DYSF;ELMO2;ERGIC1;FCER1G;FCGRT;FCN1;FES;FGR;GAB2;GNAI2;GRB2;HCK;HCLS1;HGS;HK3;HLA-E;IGF2R;IL1RN;IL4R;KATNB1;KCNMB1;KIF1B;LAMP1;LAMP2;LAPTM5;L…
GO:0001820	serotonin secretion	4	0.36	0.0084581	FCER1G;LILRB1;P2RX1;SYK
GO:0001911	negative regulation of leukocyte mediated cytotoxicity	4	0.36	0.0084581	ARRB2;HLA-B;HLA-E;LILRB1
GO:0072608	interleukin-10 secretion	4	0.36	0.0084581	LILRB1;PRKCZ;PYCARD;TNFRSF9
GO:0007173	epidermal growth factor receptor signaling pathway	19	7.81	0.00895366	ADRA2A;AKT1;APLP2;ERBB2;FES;GRB2;HGS;MAPK1;MMP9;MVB12A;PHLPP1;PLAUR;PRKACA;PRKCD;PXN;RAF1;REPS2;TGFB1;VAV1
GO:0002448	mast cell mediated immunity	7	1.35	0.00895366	CD300A;FCER1G;FES;FGR;GAB2;LAT2;SYK
GO:0009620	response to fungus	7	1.35	0.00895366	COTL1;GNLY;NCF1;S100A9;SYK;TGFB1;TLR4
GO:0051128	regulation of cellular component organization	92	65.15	0.00939598	ACIN1;ACTN4;ADIPOR2;AKT1;ALDOA;ARAP1;ARHGEF11;ARRB2;ARSB;ATG13;BAP1;BCR;BRCA1;CD300A;CDA;CDC42EP4;CORO1A;CSF1R;CSNK1D;CST3;CXCL16;CYBA;ENC1;ERBB2;FCER1G;FES;FGR;FMNL1;GAS7;GCM1;GLIPR2;GMIP;GRB2;H2AFY;HCK;HCLS1;ILK;JARID2;JDP2;KATNB1;LILRB1;LMO4;LST1;MAP1S;MAPK1;MARK2;MID1IP1;MMP9;MTG2;MVB12A;MYH9;MYO1F;NAIF1;NR1H2;PARVB;PFN1;PLAGL2;PLAUR;PLXNB2;PREX1;PRKACA;PRKCD;PRKCZ;PRKD2;PRMT5;PXN;PYCARD;RAC2…
GO:0033674	positive regulation of kinase activity	32	16.74	0.0096614	ADAM8;ADRA2A;AKT1;ATP6V0D1;C5AR1;CD300A;CD74;CLSPN;CSF1R;ERBB2;FGR;FPR1;GNAI2;IKBKG;IL1RN;ILK;MAP3K11;MAP3K3;MAPK1;MAPKAPK2;MAPRE3;MARK2;PRKACA;PRKCZ;PXN;RAF1;SLC11A1;SYK;TGFB1;TLR4;TRAF6;VAV3
GO:0002369	T cell cytokine production	5	0.66	0.010163	C10orf54;PRKCZ;SASH3;SLC11A1;TRAF6
GO:0045580	regulation of T cell differentiation	11	3.25	0.0104625	ADAM8;CD74;ERBB2;HLA-G;IL4R;IRF1;LILRB2;PRKCZ;RARA;SASH3;SYK
GO:0071216	cellular response to biotic stimulus	14	4.89	0.0104625	ARG1;CXCL16;HCK;LILRB1;LILRB2;MAPK1;PYCARD;RARA;RELA;SYK;TGFB1;TLR4;TNFRSF1B;TRAF6
GO:0033993	response to lipid	41	23.53	0.0105497	ABCG1;ARG1;ARSB;BCR;BRCA1;C5AR1;CA4;CEBPA;CEBPB;CXCL16;DGAT2;FOSL2;GNG2;HCK;IGF2R;IL1RN;IL4R;JUND;KMT2D;LILRB1;LILRB2;MAPK1;MAPKAPK2;NCOA1;NR1H2;PDK3;PTGDS;PYCARD;RARA;RELA;S100A9;SERPINA1;SETX;SLC11A1;TGFB1;THBD;TLR4;TNFRSF1A;TNFRSF1B;TRAF6;VDR
GO:0071219	cellular response to molecule of bacterial origin	13	4.33	0.010564	ARG1;CXCL16;HCK;LILRB1;LILRB2;MAPK1;PYCARD;RARA;RELA;TGFB1;TLR4;TNFRSF1B;TRAF6
GO:0030316	osteoclast differentiation	10	2.76	0.0108447	CEBPB;CSF1R;GAB2;LILRB1;LILRB3;SBNO2;TFE3;TLR4;TRAF6;TYROBP
GO:0033003	regulation of mast cell activation	6	1.02	0.011548	CD300A;FCER1G;FES;FGR;GAB2;SYK
GO:0002702	positive regulation of production of molecular mediator of immune response	8	1.84	0.0117465	CD74;FCER1G;HLA-E;PRKCZ;SASH3;TGFB1;TLR4;TRAF6
GO:0002830	positive regulation of type 2 immune response	4	0.39	0.011833	CD74;IL4R;PRKCZ;RARA
GO:0019883	antigen processing and presentation of endogenous antigen	4	0.39	0.011833	CD74;HLA-B;HLA-C;HLA-E
GO:0050855	regulation of B cell receptor signaling pathway	4	0.39	0.011833	CD300A;CMTM3;NFAM1;PTPN6
GO:0010951	negative regulation of endopeptidase activity	18	7.38	0.0119269	AKT1;APLP2;ARRB2;CST3;CST4;CST7;MKL1;MMP9;PLAUR;POR;RAF1;RENBP;RPS6KA1;SERPINA1;SLPI;SPINT1;TIMP2;TNFSF14
GO:0000902	cell morphogenesis	60	38.76	0.012027	ACTB;ADAM8;ALDOA;APH1B;ARAP1;ARHGEF11;ATP6V0D1;BASP1;CACNA1D;CDC42EP4;CNTNAP1;CORO1A;CSF1R;CSNK1D;DLG3;EPHB6;ERBB2;FES;FGR;FMNL1;GAS7;GLIPR2;GRB2;HCK;IFT80;ILK;LST1;MAP1S;MAPK1;MARK2;MMP9;MYH9;MYO9B;NCAM1;PARVB;PEAK1;PITPNA;PLXNB2;PREX1;PRKCZ;PSENEN;PTPN6;PXN;RAC2;RAF1;RHOB;RHOG;RILPL1;RPS6KA1;S100A4;S100A6;SNX1;SSH1;SSH2;TGFB1;TPGS1;TYROBP;VAV3;VDR;VRK3
GO:1903708	positive regulation of hemopoiesis	14	4.99	0.0124391	ACIN1;ADAM8;CD101;CD74;FES;HCLS1;HLA-G;IL4R;LILRB2;PRKCZ;RARA;SASH3;SYK;TRAF6
GO:0002478	antigen processing and presentation of exogenous peptide antigen	15	5.58	0.0125005	AP1M1;CD74;CTSD;CYBA;FCER1G;HLA-B;HLA-C;HLA-E;HLA-F;HLA-G;NCF1;NCF4;PSMB3;PSMD13;TRAF6
GO:0045824	negative regulation of innate immune response	6	1.05	0.0134967	ARRB2;HLA-B;HLA-E;LILRB1;NR1H2;TRAFD1
GO:0006629	lipid metabolic process	62	40.6	0.0135522	ABCG1;ACP6;ADIPOR2;ADRA2A;AKT1;ALOX5;APLP2;APOBR;ARSB;BRCA1;CD74;CEBPA;CPT2;CSF1R;CYP4F2;DGAT1;DGAT2;DGKK;FGR;G6PD;H2AFY;HELZ2;HSD17B1;IL1RN;INPP5D;MAPKAPK2;MBOAT7;MID1IP1;MTMR14;MTMR3;NAGA;NCF1;NCOA1;NEU1;NFYC;NR1H2;OPA3;P2RX1;PCYT1A;PDK3;PITPNA;PLAGL2;PLAUR;PLBD1;POR;PRKACA;PRKCD;PSAP;PTGDS;QKI;RARA;SGPL1;SLC25A20;SLC27A3;SLC44A2;SPTLC2;SYK;TBXAS1;TGFB1;TNFRSF1A;VAV3;VDR
GO:0009306	protein secretion	28	14.24	0.0137209	ADAM8;ADRA2A;CACNA1D;CAMK2G;CSF1R;FCN1;FGR;HLA-E;IL1RN;IL4R;LILRB1;MARCKS;NLRP12;NR1H2;PRKACA;PRKCZ;PYCARD;RAB11FIP1;RAB37;RAB3D;RHBDF2;RNF19B;SYK;TGFB1;TLR4;TNFRSF9;TRAF6;TREM1
GO:0042327	positive regulation of phosphorylation	46	27.9	0.0151276	ADAM8;ADRA2A;AKT1;ARRB2;ATP6V0D1;C5AR1;CD300A;CD74;CDH2;CLSPN;CSF1R;CSNK1D;ERBB2;FGR;FPR1;GLIPR2;GNAI2;HCLS1;IKBKG;IL1RN;ILK;MAP3K11;MAP3K3;MAPK1;MAPKAPK2;MAPRE3;MARK2;MMP9;PLAUR;PPP1R15A;PRKACA;PRKCZ;PRKD2;PXN;PYCARD;RAF1;RARA;SCIMP;SLC11A1;SYK;TGFB1;TIMP2;TLR4;TNFRSF1A;TRAF6;VAV3
GO:0002761	regulation of myeloid leukocyte differentiation	11	3.41	0.0152752	ACIN1;CD101;CEBPB;HCLS1;LILRB1;LILRB3;RARA;TFE3;TLR4;TRAF6;TYROBP
GO:0001916	positive regulation of T cell mediated cytotoxicity	5	0.72	0.0154831	HLA-B;HLA-C;HLA-E;HLA-F;HLA-G
GO:0050663	cytokine secretion	13	4.53	0.0154831	CSF1R;FCN1;FGR;IL4R;LILRB1;NLRP12;PRKCZ;PYCARD;RNF19B;SYK;TLR4;TNFRSF9;TREM1
GO:0019538	protein metabolic process	195	160.29	0.0154982	ABCG1;ABTB1;ACTB;ADAM23;ADAM8;ADAMTS2;ADRA2A;AKT1;APH1B;APLP2;AREL1;ARRB2;ARSB;ASB6;ATP6V0D1;BAP1;BCKDK;BCR;BMX;BRCA1;C5AR1;CAMK2G;CAMKK2;CANT1;CAPN1;CD300A;CD59;CD74;CEBPA;CEBPB;CFD;CFP;CHST15;CIRBP;CLSPN;CSF1R;CSNK1D;CST3;CST4;CST7;CTDSP1;CTSD;DAPK2;DCAF15;DENND3;DMPK;EIF1AY;ENC1;EPHB6;ERBB2;FCN1;FES;FGR;FKBP9;FLOT2;FPR1;G6PD;GALNT2;GAPDH;GNAI2;H2AFY;HCK;HCLS1;HGS;HPSE;HSPA6;IDS;IKBKG;IL1RN;ILK…
GO:0051174	regulation of phosphorus metabolic process	71	48.34	0.0156608	ADAM8;ADRA2A;AKT1;APLP2;ARRB2;ATP6V0D1;C5AR1;CAMKK2;CD300A;CD74;CDA;CDH2;CEBPA;CLSPN;CSF1R;CSNK1D;CTDSP1;DLG3;ELL;ERBB2;FGR;FPR1;GLIPR2;GNAI2;GRB2;H2AFY;HCLS1;HGS;IKBKG;IL1RN;ILK;LEMD2;MAP3K11;MAP3K3;MAPK1;MAPKAPK2;MAPRE3;MARK2;MMP9;MVP;NLRP12;PDK3;PLAUR;PLXNB2;PPP1R15A;PRKACA;PRKCD;PRKCZ;PRKD2;PSAP;PTPN6;PXN;PYCARD;RAF1;RARA;RGS3;ROPN1L;SCIMP;SLC11A1;SLC9A3R1;STK40;SYK;TADA3;TGFB1;TIMP2;TLR4;TNF…
GO:0048519	negative regulation of biological process	172	138.7	0.0157098	ABCG1;ABHD2;ACIN1;ACTN1;ACTN4;ADAM8;ADIPOR2;ADRA2A;AKT1;APLP2;ARAP1;AREL1;ARHGEF11;ARRB2;BAP1;BASP1;BCR;BRCA1;C10orf54;C5AR1;CBFA2T3;CD300A;CD59;CD74;CDA;CDH2;CEBPA;CEBPB;CIRBP;CLSPN;CORO1A;CST3;CST4;CST7;CTDSP1;CYBA;CYP4F2;DHX34;DLG3;DNAJC5;DST;ELL;ENC1;ERBB2;ETV6;FCER1G;FCN1;FLOT2;G6PD;GAPDH;GAS7;GMIP;GNAI2;GRB2;H2AFY;HCK;HCLS1;HGS;HLA-B;HLA-E;HLA-G;HSH2D;IFITM2;IFITM3;IFT80;IKBKG;IL1RN;IL4R;IL…
GO:0031061	negative regulation of histone methylation	4	0.43	0.0158496	BRCA1;H2AFY;JARID2;SUPT6H
GO:0031342	negative regulation of cell killing	4	0.43	0.0158496	ARRB2;HLA-B;HLA-E;LILRB1
GO:0033008	positive regulation of mast cell activation involved in immune response	4	0.43	0.0158496	FCER1G;FGR;GAB2;SYK
GO:0043306	positive regulation of mast cell degranulation	4	0.43	0.0158496	FCER1G;FGR;GAB2;SYK
GO:0045066	regulatory T cell differentiation	4	0.43	0.0158496	HLA-G;IRF1;LILRB2;TGFB1
GO:0045630	positive regulation of T-helper 2 cell differentiation	3	0.2	0.0158968	IL4R;PRKCZ;RARA
GO:2001185	regulation of CD8-positive, alpha-beta T cell activation	3	0.2	0.0158968	HLA-E;IRF1;LILRB1
GO:0010941	regulation of cell death	69	46.77	0.0162239	ACIN1;ACTN1;ACTN4;ADAM8;AKT1;APH1B;AREL1;ARHGEF11;ARRB2;BRCA1;C5AR1;CD59;CD74;CEBPB;CORO1A;DAPK2;DNAJC5;FCER1G;G6PD;HCK;HCLS1;HSH2D;IGF2R;IKBKG;IL1RN;ILK;JUND;KATNB1;LILRB1;MAP3K11;MKL1;MMP9;MNT;MYD88;NACC2;NCOA1;NLRP12;P2RX1;PLAGL2;PLAUR;PLEKHF1;POR;PRKCD;PRKCZ;PSENEN;PSMB3;PSMD13;PYCARD;RAF1;RARA;RBCK1;RELA;RHOB;RILPL1;RPS6KA1;S100A9;SETX;SLC9A1;SLC9A3R1;STK40;TGFB1;TNFRSF1A;TNFSF14;TRAF6;TWIST…
GO:0045860	positive regulation of protein kinase activity	30	15.88	0.0163209	ADAM8;ADRA2A;AKT1;ATP6V0D1;C5AR1;CD300A;CD74;CLSPN;CSF1R;ERBB2;FPR1;GNAI2;IKBKG;IL1RN;ILK;MAP3K11;MAP3K3;MAPK1;MAPKAPK2;MAPRE3;MARK2;PRKACA;PRKCZ;PXN;RAF1;SLC11A1;SYK;TGFB1;TLR4;TRAF6
GO:0007162	negative regulation of cell adhesion	16	6.37	0.0164486	C10orf54;CD300A;CD74;CEBPB;ERBB2;HLA-G;IL1RN;IL4R;IRF1;LILRB1;LILRB2;MYO1F;PRKCD;PTPN6;SIPA1;TGFB1
GO:0010466	negative regulation of peptidase activity	18	7.65	0.0169393	AKT1;APLP2;ARRB2;CST3;CST4;CST7;MKL1;MMP9;PLAUR;POR;RAF1;RENBP;RPS6KA1;SERPINA1;SLPI;SPINT1;TIMP2;TNFSF14
GO:0031056	regulation of histone modification	11	3.48	0.0171939	BRCA1;H2AFY;JARID2;JDP2;PRKD2;RNF40;RTF1;SPI1;SUPT6H;TADA3;TGFB1
GO:0019884	antigen processing and presentation of exogenous antigen	15	5.81	0.0179755	AP1M1;CD74;CTSD;CYBA;FCER1G;HLA-B;HLA-C;HLA-E;HLA-F;HLA-G;NCF1;NCF4;PSMB3;PSMD13;TRAF6
GO:0045621	positive regulation of lymphocyte differentiation	9	2.46	0.0180843	ADAM8;CD74;HLA-G;IL4R;LILRB2;PRKCZ;RARA;SASH3;SYK
GO:1903707	negative regulation of hemopoiesis	12	4.07	0.0186569	CD74;ERBB2;HLA-G;IL4R;IRF1;KLF13;LILRB1;LILRB3;PGLYRP1;RARA;TLR4;TWIST2
GO:0032418	lysosome localization	7	1.54	0.0187727	CD300A;FCER1G;FES;FGR;GAB2;LAT2;SYK
GO:0042116	macrophage activation	7	1.54	0.0187727	CD74;IL4R;SBNO2;SLC11A1;SYK;TLR4;TYROBP
GO:1903557	positive regulation of tumor necrosis factor superfamily cytokine production	7	1.54	0.0187727	ADAM8;FCER1G;HLA-E;PYCARD;SASH3;TLR4;TNFRSF1A
GO:0045637	regulation of myeloid cell differentiation	15	5.84	0.0187727	ACIN1;CD101;CEBPB;FES;HCLS1;KLF13;LILRB1;LILRB3;RARA;SPI1;TFE3;TLR4;TRAF6;TWIST2;TYROBP
GO:0019220	regulation of phosphate metabolic process	70	47.92	0.0187911	ADAM8;ADRA2A;AKT1;APLP2;ARRB2;ATP6V0D1;C5AR1;CAMKK2;CD300A;CD74;CDA;CDH2;CEBPA;CLSPN;CSF1R;CSNK1D;CTDSP1;DLG3;ELL;ERBB2;FGR;FPR1;GLIPR2;GNAI2;GRB2;H2AFY;HCLS1;HGS;IKBKG;IL1RN;ILK;LEMD2;MAP3K11;MAP3K3;MAPK1;MAPKAPK2;MAPRE3;MARK2;MMP9;MVP;NLRP12;PLAUR;PLXNB2;PPP1R15A;PRKACA;PRKCD;PRKCZ;PRKD2;PSAP;PTPN6;PXN;PYCARD;RAF1;RARA;RGS3;ROPN1L;SCIMP;SLC11A1;SLC9A3R1;STK40;SYK;TADA3;TGFB1;TIMP2;TLR4;TNFRSF1A…
GO:0010033	response to organic substance	108	80.9	0.0191283	ABCG1;ADIPOR2;ADRA2A;AKT1;APH1B;ARG1;ARHGEF11;ARRB2;ARSB;ATP6V0D1;BCR;BRCA1;C5AR1;CA4;CAMK2G;CD74;CEBPA;CEBPB;CORO1A;CSF1R;CSF3R;CXCL16;CXCR1;CYBA;DGAT2;ERBB2;FGR;FOSL2;G6PD;GAPDH;GNB2;GNG2;GPX3;GRB2;HCK;HCLS1;HLA-B;HLA-C;HLA-E;HLA-F;HLA-G;HSPA6;IFITM2;IFITM3;IGF2R;IL17RA;IL1RN;IL4R;IRF1;JUND;KMT2D;LILRB1;LILRB2;MAPK1;MAPKAPK2;MX2;MYD88;NCAM1;NCOA1;NLRP12;NR1H2;NUP214;P2RX1;PDK3;PFN1;PHLPP1;POR;P…
GO:0043154	negative regulation of cysteine-type endopeptidase activity involved in apoptotic process	9	2.49	0.0195422	AKT1;ARRB2;MKL1;MMP9;PLAUR;POR;RAF1;RPS6KA1;TNFSF14
GO:0002474	antigen processing and presentation of peptide antigen via MHC class I	11	3.54	0.0195855	CYBA;FCER1G;HLA-B;HLA-C;HLA-E;HLA-F;HLA-G;NCF1;NCF4;PSMB3;PSMD13
GO:1902275	regulation of chromatin organization	12	4.1	0.0196027	BRCA1;H2AFY;JARID2;JDP2;MAP1S;PRKD2;RNF40;RTF1;SPI1;SUPT6H;TADA3;TGFB1
GO:0001913	T cell mediated cytotoxicity	6	1.15	0.0203715	HLA-B;HLA-C;HLA-E;HLA-F;HLA-G;LILRB1
GO:0030225	macrophage differentiation	6	1.15	0.0203715	CEBPA;CSF1R;HCLS1;ITGAM;MMP9;SPI1
GO:0032968	positive regulation of transcription elongation from RNA polymerase II promoter	4	0.46	0.0204763	ELL;GTF2F1;RTF1;SUPT6H
GO:0051050	positive regulation of transport	43	26.06	0.0205806	ABCG1;ACTN4;ADAM8;ADIPOR2;ADRA2A;AKT1;ARRB2;ATG13;BAP1;BCR;CACNA1D;CSF1R;CYBA;CYP4F2;FCER1G;FCN1;FGR;GAB2;HCLS1;HGS;HLA-E;IL4R;LAMP1;NLRP12;NR1H2;P2RX1;PLAGL2;PRKACA;PRKCD;PRKCZ;PYCARD;RAB3D;RAC2;RBCK1;S100A9;SLC11A1;SLC9A1;SYK;TGFB1;TLR4;TNFRSF1A;TNFSF14;VPS37B
GO:0051092	positive regulation of NF-kappaB transcription factor activity	12	4.14	0.0207856	ADAM8;IKBKG;PRKCZ;PRKD2;PYCARD;RBCK1;RELA;S100A9;TGFB1;TLR4;TRAF6;TRIM8
GO:0006801	superoxide metabolic process	7	1.58	0.0207933	CYBA;NCF1;NRROS;PREX1;PRKCD;SYK;TGFB1
GO:0032989	cellular component morphogenesis	62	41.48	0.0211994	ACTB;ADAM8;ALDOA;APH1B;ARAP1;ARHGEF11;ATP6V0D1;BASP1;CACNA1D;CDC42EP4;CNTNAP1;CORO1A;CSF1R;CSNK1D;DLG3;EPHB6;ERBB2;FES;FGR;FMNL1;GAS7;GLIPR2;GRB2;HCK;IFT80;ILK;LST1;MAP1S;MAPK1;MARK2;MMP9;MYH9;MYO9B;NCAM1;OPA3;PARVB;PEAK1;PITPNA;PLXNB2;PREX1;PRKCZ;PSENEN;PTPN6;PXN;RAC2;RAF1;RHOB;RHOG;RILPL1;RPS6KA1;S100A4;S100A6;SNX1;SSH1;SSH2;TGFB1;TPGS1;TTN;TYROBP;VAV3;VDR;VRK3
GO:0032733	positive regulation of interleukin-10 production	5	0.79	0.0216292	FCER1G;PRKCZ;PYCARD;SASH3;TLR4
GO:0042554	superoxide anion generation	5	0.79	0.0216292	CYBA;NCF1;PRKCD;SYK;TGFB1
GO:0044765	single-organism transport	150	119.46	0.0223665	ABCG1;ACTB;ACTN1;ACTN4;ADAM8;ADIPOR2;ADRA2A;AKT1;ALDOA;AP1M1;APOBR;ARG1;ARRB2;ARSB;ATG13;ATP6V0D1;BAP1;BCR;BEST1;CA4;CACNA1D;CAMK2G;CD209;CD300A;CD74;CFD;CLCN4;CNTNAP1;CORO1A;CPT2;CSF1R;CXCR1;CYBA;CYP4F2;DENND3;DNAJC5;ELMO2;ERGIC1;FCER1G;FCGRT;FCN1;FES;FGR;GAB2;GNAI2;GRB2;HCK;HCLS1;HGS;HK3;HLA-E;IL1RN;IL4R;KATNB1;KCNMB1;KIF1B;LAMP1;LAMP2;LAT2;LILRB1;LILRB2;MAP1S;MAPK1;MARCKS;MFSD5;MGRN1;MICU1;MMP…
GO:0051338	regulation of transferase activity	47	29.37	0.0225844	ADAM8;ADRA2A;AKT1;APLP2;ATP6V0D1;C5AR1;CAMKK2;CD300A;CD74;CEBPA;CLSPN;CSF1R;ERBB2;FGR;FPR1;GNAI2;H2AFY;HGS;IKBKG;IL1RN;ILK;MAP3K11;MAP3K3;MAPK1;MAPKAPK2;MAPRE3;MARK2;MVP;PRKACA;PRKCD;PRKCZ;PSMB3;PSMD13;PTPN6;PXN;PYCARD;RAF1;RARA;RGS3;SLC11A1;SLC9A3R1;SYK;TGFB1;TLR4;TRAF6;TTN;VAV3
GO:0043412	macromolecule modification	138	108.47	0.0225844	ADAM8;ADRA2A;AKT1;APLP2;AREL1;ARRB2;ARSB;ASB6;ATP6V0D1;BAP1;BCKDK;BCR;BMX;BRCA1;C5AR1;CAMK2G;CAMKK2;CD300A;CD74;CEBPA;CFP;CLSPN;CSF1R;CSNK1D;CTDSP1;DAPK2;DCAF15;DMPK;ENC1;EPHB6;ERBB2;FES;FGR;FKBP9;FPR1;G6PD;GALNT2;GAPDH;GNAI2;H2AFY;HCK;HCLS1;HGS;IKBKG;IL1RN;ILK;JARID2;JDP2;KCTD13;KDM1B;KDM6B;KLHL21;KMT2D;MAN2A2;MAP3K11;MAP3K3;MAPK1;MAPKAPK2;MAPRE3;MARK2;MAST3;MGAT1;MGRN1;MMP9;MTMR14;MTMR3;MVP;NAC…
GO:2000117	negative regulation of cysteine-type endopeptidase activity	9	2.56	0.0227816	AKT1;ARRB2;MKL1;MMP9;PLAUR;POR;RAF1;RPS6KA1;TNFSF14
GO:0097581	lamellipodium organization	8	2.07	0.0228433	MYO9B;PARVB;PXN;RAC2;SNX1;SSH1;SSH2;VAV3
GO:0045576	mast cell activation	7	1.61	0.0230892	CD300A;FCER1G;FES;FGR;GAB2;LAT2;SYK
GO:0042981	regulation of apoptotic process	65	44.18	0.0232029	ACIN1;ACTN1;ACTN4;ADAM8;AKT1;APH1B;AREL1;ARHGEF11;ARRB2;BRCA1;C5AR1;CD59;CD74;CEBPB;CORO1A;DAPK2;DNAJC5;FCER1G;G6PD;HCK;HCLS1;HSH2D;IGF2R;IKBKG;IL1RN;ILK;LILRB1;MAP3K11;MKL1;MMP9;MNT;MYD88;NACC2;NCOA1;NLRP12;P2RX1;PLAGL2;PLAUR;PLEKHF1;POR;PRKCD;PRKCZ;PSENEN;PSMB3;PSMD13;PYCARD;RAF1;RARA;RBCK1;RELA;RHOB;RPS6KA1;S100A9;SETX;SLC9A1;SLC9A3R1;STK40;TGFB1;TNFRSF1A;TNFSF14;TRAF6;TWIST2;VAV1;VAV3;VDR
GO:0018209	peptidyl-serine modification	17	7.29	0.0241845	AKT1;ARRB2;CLSPN;CSNK1D;GALNT2;HCLS1;ILK;MAPK1;MAPKAPK2;PDK3;PPP1R15A;PRKACA;PRKCZ;PRKD2;RAF1;TGFB1;VRK3
GO:0032627	interleukin-23 production	3	0.23	0.024885	IL17RA;MYD88;TLR4
GO:0032667	regulation of interleukin-23 production	3	0.23	0.024885	IL17RA;MYD88;TLR4
GO:0002446	neutrophil mediated immunity	5	0.82	0.0255656	BCR;MYO1F;NCF1;SYK;TREM1
GO:0046596	regulation of viral entry into host cell	5	0.82	0.0255656	FCN1;IFITM2;IFITM3;TRIM21;TRIM8
GO:0051049	regulation of transport	74	51.99	0.0255656	ABCG1;ACTN4;ADAM8;ADIPOR2;ADRA2A;AKT1;ARG1;ARRB2;ATG13;BAP1;BCR;BEST1;CACNA1D;CAMK2G;CD300A;CD74;CLCN4;CORO1A;CSF1R;CYBA;CYP4F2;FCER1G;FCN1;FES;FGR;GAB2;GNAI2;HCK;HCLS1;HGS;HLA-E;IL1RN;IL4R;LAMP1;LILRB1;LILRB2;MAPK1;MARCKS;MMP9;MVB12A;MX2;NLRP12;NR1H2;NUP214;OS9;P2RX1;PLAGL2;PRKACA;PRKCD;PRKCZ;PTPN6;PYCARD;RAB11FIP1;RAB37;RAB3D;RAC2;RBCK1;RHBDF2;S100A9;SLC11A1;SLC9A1;SLC9A3R1;SUPT6H;SYK;TGFB1;TLR…
GO:0031293	membrane protein intracellular domain proteolysis	4	0.49	0.0258981	APH1B;PSENEN;RELA;TRAF6
GO:0033005	positive regulation of mast cell activation	4	0.49	0.0258981	FCER1G;FGR;GAB2;SYK
GO:1902578	single-organism localization	156	125.57	0.0263002	ABCG1;ACTB;ACTN1;ACTN4;ADAM8;ADIPOR2;ADRA2A;AKT1;ALDOA;AP1M1;APOBR;ARG1;ARRB2;ARSB;ATG13;ATP6V0D1;BAP1;BCR;BEST1;CA4;CACNA1D;CAMK2G;CD209;CD300A;CD74;CFD;CLCN4;CNTNAP1;CORO1A;CPT2;CSF1R;CXCR1;CYBA;CYP4F2;DENND3;DLG3;DNAJC5;ELMO2;ERGIC1;FCER1G;FCGRT;FCN1;FES;FGR;FLOT2;GAB2;GNAI2;GRB2;HCK;HCLS1;HGS;HK3;HLA-E;IL1RN;IL4R;INSC;KATNB1;KCNMB1;KIF1B;LAMP1;LAMP2;LAT2;LILRB1;LILRB2;MAP1S;MAPK1;MARCKS;MFSD5…
GO:0031325	positive regulation of cellular metabolic process	110	83.59	0.0263698	ADAM8;ADRA2A;AKNA;AKT1;ARAP1;ARHGEF11;ARRB2;ATP6V0D1;BRCA1;C5AR1;CAMKK2;CBFA2T3;CD300A;CD74;CDH2;CEBPA;CEBPB;CIRBP;CLSPN;CSF1R;CSNK1D;ELL;ERBB2;ETV6;FGR;FPR1;GCM1;GLIPR2;GNAI2;GRB2;GTF2F1;GTPBP1;HCLS1;HELZ2;IKBKG;IL1RN;ILK;IRF1;JARID2;JDP2;JUND;KCTD13;KDM6B;KLF13;KMT2D;LILRB1;LMO4;MAML3;MAP3K11;MAP3K3;MAPK1;MAPKAPK2;MAPRE3;MARK2;MID1IP1;MKL1;MMP9;NCOA1;NFIC;NFYC;NLRP12;NR1H2;P2RX1;PFN1;PHKG2;PLAG…
GO:0043067	regulation of programmed cell death	65	44.47	0.026757	ACIN1;ACTN1;ACTN4;ADAM8;AKT1;APH1B;AREL1;ARHGEF11;ARRB2;BRCA1;C5AR1;CD59;CD74;CEBPB;CORO1A;DAPK2;DNAJC5;FCER1G;G6PD;HCK;HCLS1;HSH2D;IGF2R;IKBKG;IL1RN;ILK;LILRB1;MAP3K11;MKL1;MMP9;MNT;MYD88;NACC2;NCOA1;NLRP12;P2RX1;PLAGL2;PLAUR;PLEKHF1;POR;PRKCD;PRKCZ;PSENEN;PSMB3;PSMD13;PYCARD;RAF1;RARA;RBCK1;RELA;RHOB;RPS6KA1;S100A9;SETX;SLC9A1;SLC9A3R1;STK40;TGFB1;TNFRSF1A;TNFSF14;TRAF6;TWIST2;VAV1;VAV3;VDR
GO:0070613	regulation of protein processing	24	12.14	0.0269225	ADAM8;AKT1;APLP2;ARRB2;CD59;CFP;CST3;CST4;CST7;MKL1;MMP9;MYH9;NR1H2;PLAUR;POR;PRKACA;RAF1;RENBP;RPS6KA1;SERPINA1;SLPI;SPINT1;TIMP2;TNFSF14
GO:0019222	regulation of metabolic process	245	210.61	0.026994	ABCG1;ACIN1;ACTN1;ACTN4;ADAM8;ADRA2A;AKNA;AKT1;APH1B;APLP2;ARAP1;ARHGAP26;ARHGAP27;ARHGAP30;ARHGAP9;ARHGEF11;ARHGEF40;ARRB2;ATG13;ATP6V0D1;BASP1;BCR;BNC2;BRCA1;C10orf54;C5AR1;CAMKK2;CBFA2T3;CD300A;CD59;CD74;CDA;CDH2;CEBPA;CEBPB;CFP;CIRBP;CLSPN;CSF1R;CSNK1D;CST3;CST4;CST7;CTDSP1;CYTH2;DAPK2;DENND3;DHX34;DLG3;DMPK;DNMBP;DOCK5;ELL;ENC1;ERBB2;ETV6;FGR;FLII;FLOT2;FOSL2;FPR1;G6PD;GAPDH;GAS7;GCM1;GIT2;G…
GO:0038095	Fc-epsilon receptor signaling pathway	15	6.1	0.026994	AKT1;ERBB2;FCER1G;GAB2;GRB2;IKBKG;LAT2;MAPK1;PHLPP1;RAF1;RELA;SYK;TRAF6;VAV1;VAV3
GO:0051924	regulation of calcium ion transport	15	6.1	0.026994	ADRA2A;ARRB2;BEST1;CACNA1D;CAMK2G;CORO1A;CYBA;GNAI2;LILRB1;LILRB2;P2RX1;PRKACA;PTPN6;SLC9A1;TGFB1
GO:0048869	cellular developmental process	151	121.3	0.0295414	ABCG1;ACIN1;ACTB;ADAM8;AKT1;ALDOA;AP1M1;APH1B;ARAP1;ARHGEF11;ARSB;ATP6V0D1;BASP1;BMX;C10orf54;CACNA1D;CAMK2G;CBFA2T3;CD101;CD74;CDC42EP4;CDH2;CEBPA;CEBPB;CNTNAP1;CORO1A;CSF1R;CSNK1D;CTDSP1;DGKG;DLG3;DMPK;ENC1;EPHB6;ERBB2;ETV6;FES;FGR;FMNL1;G6PD;GAB2;GAS7;GCM1;GLIPR2;GRB2;H2AFY;HCK;HCLS1;HLA-B;HLA-G;HOXB7;IFT80;IL4R;ILK;INSC;IRF1;ITGAM;JARID2;JDP2;JUND;KATNB1;KDM6B;KLF13;KMT2D;LEMD2;LILRB1;LILRB2;…
GO:0001912	positive regulation of leukocyte mediated cytotoxicity	6	1.25	0.0296728	HLA-B;HLA-C;HLA-E;HLA-F;HLA-G;LAMP1
GO:0032673	regulation of interleukin-4 production	5	0.85	0.0299414	CEBPB;HLA-E;PRKCZ;RARA;SASH3
GO:0018105	peptidyl-serine phosphorylation	16	6.83	0.0307074	AKT1;ARRB2;CLSPN;CSNK1D;HCLS1;ILK;MAPK1;MAPKAPK2;PDK3;PPP1R15A;PRKACA;PRKCZ;PRKD2;RAF1;TGFB1;VRK3
GO:0050864	regulation of B cell activation	10	3.25	0.0325276	CD300A;CD74;NFAM1;PTPN6;SASH3;SUPT6H;SYK;TGFB1;TLR4;VAV3
GO:0002724	regulation of T cell cytokine production	4	0.53	0.0325276	C10orf54;PRKCZ;SASH3;TRAF6
GO:0002888	positive regulation of myeloid leukocyte mediated immunity	4	0.53	0.0325276	FCER1G;FGR;GAB2;SYK
GO:0006837	serotonin transport	4	0.53	0.0325276	FCER1G;LILRB1;P2RX1;SYK
GO:0040012	regulation of locomotion	36	21.3	0.0325768	ABHD2;ADAM8;ADRA2A;AKT1;ARSB;BCR;CD300A;CD74;CORO1A;CSF1R;CXCL16;FCN1;FES;FGR;GLIPR2;IFITM2;IFITM3;IL16;IL1RN;ILK;LGR6;MAPK1;MMP9;MYO1F;PFN1;PLXNB2;PRKD2;PYCARD;RAC2;RAF1;SLC9A3R1;STK10;TGFB1;TNFSF14;TRIM21;TRIM8
GO:0006509	membrane protein ectodomain proteolysis	6	1.28	0.0335109	ADAM8;ADRA2A;MYH9;PSENEN;TIMP2;TNFRSF1B
GO:0051493	regulation of cytoskeleton organization	24	12.37	0.033555	ARAP1;BRCA1;CDC42EP4;CORO1A;CSF1R;FES;GRB2;HCK;HCLS1;ILK;KATNB1;MAPK1;MARK2;MID1IP1;MYO1F;PFN1;PREX1;PRKCD;PYCARD;S100A9;SLC9A1;SSH1;SSH2;TGFB1
GO:1903530	regulation of secretion by cell	32	18.28	0.033555	ADAM8;ADRA2A;BCR;CACNA1D;CD300A;CSF1R;FCER1G;FCN1;FES;FGR;GAB2;HGS;HLA-E;IL1RN;IL4R;LAMP1;LILRB1;MARCKS;NLRP12;NR1H2;PRKACA;PRKCZ;PYCARD;RAB11FIP1;RAB37;RAB3D;RHBDF2;SYK;TGFB1;TLR4;TNFRSF9;TRAF6
GO:0050671	positive regulation of lymphocyte proliferation	11	3.84	0.0341252	CD59;CD74;CORO1A;HLA-E;LILRB2;PYCARD;SASH3;SYK;TLR4;TRAF6;VAV3
GO:0045730	respiratory burst	5	0.89	0.0348338	CYBA;HCK;NCF1;RAC2;SLC11A1
GO:2000249	regulation of actin cytoskeleton reorganization	5	0.89	0.0348338	CSF1R;FES;HCK;HCLS1;TGFB1
GO:0051094	positive regulation of developmental process	50	32.59	0.03553	ACIN1;ADAM8;AKT1;ARSB;BASP1;BRCA1;C10orf54;CD101;CD74;CDH2;CEBPA;CEBPB;ENC1;FES;GCM1;GLIPR2;H2AFY;HCLS1;HLA-G;HOXB7;HPSE;IL4R;ILK;JUND;KATNB1;LILRB2;MARK2;METRNL;NCOA1;PDLIM7;PLXNB2;POR;PREX1;PRKCZ;PRKD2;RARA;RELA;RHOB;RPS6KA1;SASH3;SETX;SPEN;SYK;TGFB1;TIMP2;TNFRSF1A;TNFSF14;TRAF6;TSHZ3;VDR
GO:0033043	regulation of organelle organization	51	33.41	0.03553	ACIN1;AKT1;ARAP1;ARRB2;ATG13;BAP1;BRCA1;CDC42EP4;CORO1A;CSF1R;FES;GMIP;GRB2;H2AFY;HCK;HCLS1;ILK;JARID2;JDP2;KATNB1;MAP1S;MAPK1;MARK2;MID1IP1;MMP9;MTG2;MVB12A;MYO1F;PFN1;PLAGL2;PLAUR;PREX1;PRKCD;PRKD2;PRMT5;PYCARD;RAC2;RNF40;RTF1;S100A9;SLC9A1;SPI1;SSH1;SSH2;SUPT6H;TADA3;TGFB1;TREM1;VPS18;VPS37B;YIPF1
GO:0002755	MyD88-dependent toll-like receptor signaling pathway	9	2.76	0.0356738	IKBKG;IRF1;MAPK1;MAPKAPK2;MYD88;RELA;RPS6KA1;TLR4;TRAF6
GO:0016032	viral process	40	24.58	0.0357894	AP1M1;CD209;CEBPA;ELL;FCN1;GRB2;GTF2F1;HCK;HLA-B;HLA-C;IFITM2;IFITM3;IKBKG;IL16;LAMP1;MAPK1;MVB12A;NUP214;PFN1;PILRA;PSMB3;PSMD13;RAB11FIP4;RAB43;RBCK1;RELA;RPS4Y1;SLPI;SPEN;SUPT6H;SYK;TAF12;TGFB1;TNFRSF1A;TRIM21;TRIM8;VPS18;VPS37B;WWP2;ZYX
GO:0008154	actin polymerization or depolymerization	14	5.68	0.0357894	CDC42EP4;CORO1A;GAS7;GRB2;HCK;HCLS1;MSRB1;PFN1;PREX1;PRKCD;PYCARD;SSH1;SSH2;WIPF1
GO:0032946	positive regulation of mononuclear cell proliferation	11	3.87	0.0357894	CD59;CD74;CORO1A;HLA-E;LILRB2;PYCARD;SASH3;SYK;TLR4;TRAF6;VAV3
GO:0002281	macrophage activation involved in immune response	3	0.26	0.0357894	SBNO2;SYK;TYROBP
GO:0007549	dosage compensation	3	0.26	0.0357894	BRCA1;H2AFY;UPF1
GO:0051014	actin filament severing	3	0.26	0.0357894	FLII;FMNL1;MYH9
GO:0090197	positive regulation of chemokine secretion	3	0.26	0.0357894	CSF1R;IL4R;PYCARD
GO:0046631	alpha-beta T cell activation	10	3.31	0.0362306	C10orf54;CD300A;HLA-E;IL4R;IRF1;LILRB1;PRKCZ;RARA;SASH3;SYK
GO:0032956	regulation of actin cytoskeleton organization	18	8.3	0.0366784	ARAP1;CDC42EP4;CORO1A;CSF1R;FES;GRB2;HCK;HCLS1;ILK;MYO1F;PFN1;PREX1;PRKCD;PYCARD;SLC9A1;SSH1;SSH2;TGFB1
GO:0051347	positive regulation of transferase activity	34	19.95	0.0366893	ADAM8;ADRA2A;AKT1;ATP6V0D1;C5AR1;CD300A;CD74;CLSPN;CSF1R;ERBB2;FGR;FPR1;GNAI2;IKBKG;IL1RN;ILK;MAP3K11;MAP3K3;MAPK1;MAPKAPK2;MAPRE3;MARK2;PRKACA;PRKCZ;PSMB3;PSMD13;PXN;RAF1;SLC11A1;SYK;TGFB1;TLR4;TRAF6;VAV3
GO:0002221	pattern recognition receptor signaling pathway	14	5.71	0.0371762	ARRB2;CNPY3;FCN1;IKBKG;IRF1;ITGAM;MAPK1;MAPKAPK2;MYD88;PGLYRP1;RELA;RPS6KA1;TLR4;TRAF6
GO:0071260	cellular response to mechanical stimulus	8	2.26	0.0373872	AKT1;CYBA;IRF1;MYD88;SLC9A1;TLR4;TNFRSF1A;TNFSF14
GO:0044267	cellular protein metabolic process	169	138.99	0.0373872	ABTB1;ACTB;ADAM8;ADRA2A;AKT1;APH1B;APLP2;AREL1;ARRB2;ARSB;ASB6;ATP6V0D1;BAP1;BCKDK;BCR;BMX;BRCA1;C5AR1;CAMK2G;CAMKK2;CD300A;CD74;CEBPA;CFP;CIRBP;CLSPN;CSF1R;CSNK1D;CST3;CST4;CST7;CTDSP1;DAPK2;DCAF15;DENND3;DMPK;EIF1AY;ENC1;EPHB6;ERBB2;FES;FGR;FKBP9;FPR1;G6PD;GALNT2;GAPDH;GNAI2;H2AFY;HCK;HCLS1;HGS;HSPA6;IKBKG;IL1RN;ILK;JARID2;JDP2;KCTD13;KDM1B;KDM6B;KLHL21;KMT2D;MAN2A2;MAP3K11;MAP3K3;MAPK1;MAPKAPK…
GO:0050707	regulation of cytokine secretion	11	3.91	0.0374744	CSF1R;FCN1;FGR;IL4R;LILRB1;NLRP12;PRKCZ;PYCARD;SYK;TLR4;TNFRSF9
GO:1903308	regulation of chromatin modification	11	3.91	0.0374744	BRCA1;H2AFY;JARID2;JDP2;PRKD2;RNF40;RTF1;SPI1;SUPT6H;TADA3;TGFB1
GO:0040017	positive regulation of locomotion	22	11.13	0.0387374	ADAM8;ADRA2A;AKT1;CD74;CORO1A;CSF1R;CXCL16;FGR;GLIPR2;IL16;ILK;LGR6;MAPK1;MMP9;MYO1F;PFN1;PRKD2;PYCARD;RAC2;TGFB1;TNFSF14;TRIM21
GO:0043123	positive regulation of I-kappaB kinase/NF-kappaB signaling	14	5.74	0.0387374	CANT1;IKBKG;MAP3K3;MYD88;NLRP12;RBCK1;RELA;S100A4;SLC44A2;TLR4;TNFRSF1A;TNFSF14;TRAF6;TRIM8
GO:0016485	protein processing	32	18.51	0.0388374	ADAM8;ADAMTS2;AKT1;APH1B;APLP2;ARRB2;CD59;CFP;CST3;CST4;CST7;MKL1;MMP9;MYH9;NLRP12;NR1H2;P2RX1;PLAUR;POR;PRKACA;PSENEN;PYCARD;RAF1;RENBP;RPS6KA1;S100A9;SERPINA1;SLPI;SPINT1;TIMP2;TNFSF14;VPS37B
GO:0002577	regulation of antigen processing and presentation	4	0.56	0.0388679	CD74;LILRB2;PYCARD;SLC11A1
GO:0006907	pinocytosis	4	0.56	0.0388679	ACTN4;MAPKAPK2;NR1H2;PYCARD
GO:1901701	cellular response to oxygen-containing compound	43	27.14	0.039017	ADRA2A;AKT1;ARG1;ATP6V0D1;BRCA1;CEBPB;CXCL16;CYBA;DGAT2;FGR;GNB2;GNG2;GRB2;HCK;IL1RN;KDM6B;LILRB1;LILRB2;MAPK1;PDK3;POR;PRKACA;PRKCD;PRKCZ;PTPN6;PXN;PYCARD;RAF1;RARA;RELA;RHOB;SETX;SH2B2;SIPA1;SLC9A1;SSH1;TCIRG1;TGFB1;TLR4;TNFRSF1A;TNFRSF1B;TRAF6;VDR
GO:0010543	regulation of platelet activation	5	0.92	0.0390688	FCER1G;PRKCD;SYK;THBD;TLR4
GO:0050832	defense response to fungus	5	0.92	0.0390688	COTL1;GNLY;NCF1;S100A9;TGFB1
GO:0008284	positive regulation of cell proliferation	41	25.6	0.0402994	ADRA2A;AKT1;ARG1;C5AR1;CAPN1;CD59;CD74;CORO1A;CSF1R;CYBA;ERBB2;FOSL2;GAB2;GNAI2;GRN;HCK;HCLS1;HLA-E;HPSE;ILK;KMT2D;LILRB2;MAPK1;NACC2;PRKCZ;PRKD2;PTPN6;PYCARD;RAC2;RARA;RELA;RHOG;S100A6;SASH3;SYK;TCIRG1;TGFB1;TLR4;TRAF6;TWIST2;VAV3
GO:0010604	positive regulation of macromolecule metabolic process	104	79.52	0.0406661	ADAM8;ADRA2A;AKNA;AKT1;ARAP1;ARHGEF11;ARRB2;ATP6V0D1;BRCA1;C5AR1;CAMKK2;CBFA2T3;CD300A;CD74;CEBPA;CEBPB;CIRBP;CLSPN;CSF1R;CSNK1D;ELL;ERBB2;ETV6;FPR1;GCM1;GNAI2;GTF2F1;GTPBP1;H2AFY;HCLS1;HELZ2;HGS;IKBKG;IL1RN;ILK;IRF1;JARID2;JDP2;JUND;KCTD13;KDM6B;KLF13;KMT2D;LILRB1;LMO4;MAML3;MAP3K11;MAP3K3;MAPK1;MAPKAPK2;MAPRE3;MARK2;MKL1;MMP9;MYH9;NCOA1;NFIC;NFYC;NLRP12;NR1H2;P2RX1;PFN1;PHKG2;PLAGL2;PLAUR;PPP1R…
GO:0031324	negative regulation of cellular metabolic process	91	67.97	0.0407207	ACIN1;ADRA2A;AKT1;APLP2;ARRB2;BASP1;BRCA1;CBFA2T3;CD300A;CDA;CEBPA;CEBPB;CIRBP;CST3;CST4;CST7;CTDSP1;DHX34;DLG3;ELL;ENC1;ETV6;G6PD;GAPDH;GNAI2;H2AFY;HCLS1;IFITM3;ILK;IRF1;JARID2;JDP2;JUND;KMT2D;LEMD2;LILRB1;MKL1;MMP9;MNT;MVP;NACC2;NFIC;NLRP12;NR1H2;PBXIP1;PHF12;PLAUR;POR;PPP1R15A;PRKCD;PRKCZ;PRMT5;PSMB3;PSMD13;PTPN6;PYCARD;RAF1;RARA;RELA;RENBP;RGS3;RNF169;RNF40;RPS6KA1;RTF1;S100A11;SBNO2;SERPINA1…
GO:0051346	negative regulation of hydrolase activity	23	11.91	0.0411657	AKT1;APLP2;ARRB2;CST3;CST4;CST7;DLG3;ELL;GMIP;MKL1;MMP9;PLAUR;POR;PPP1R15A;PRKCZ;RAF1;RENBP;RPS6KA1;SERPINA1;SLPI;SPINT1;TIMP2;TNFSF14
GO:0032879	regulation of localization	92	68.99	0.0429803	ABCG1;ABHD2;ACTN1;ACTN4;ADAM8;ADIPOR2;ADRA2A;AKT1;ARAP1;ARG1;ARRB2;ARSB;ATG13;BAP1;BCR;BEST1;CACNA1D;CAMK2G;CD300A;CD74;CLCN4;CORO1A;CSF1R;CXCL16;CYBA;CYP4F2;FCER1G;FCN1;FES;FGR;GAB2;GLIPR2;GNAI2;HCK;HCLS1;HGS;HLA-E;IL1RN;IL4R;ILK;LAMP1;LGR6;LILRB1;LILRB2;MAPK1;MARCKS;MMP9;MVB12A;MX2;MYO1F;NLRP12;NR1H2;NUP214;OS9;P2RX1;PFN1;PLAGL2;PLXNB2;PRKACA;PRKCD;PRKCZ;PRKD2;PTPN6;PYCARD;RAB11FIP1;RAB37;RAB3D…
GO:0044764	multi-organism cellular process	40	24.91	0.0430326	AP1M1;CD209;CEBPA;ELL;FCN1;GRB2;GTF2F1;HCK;HLA-B;HLA-C;IFITM2;IFITM3;IKBKG;IL16;LAMP1;MAPK1;MVB12A;NUP214;PFN1;PILRA;PSMB3;PSMD13;RAB11FIP4;RAB43;RBCK1;RELA;RPS4Y1;SLPI;SPEN;SUPT6H;SYK;TAF12;TGFB1;TNFRSF1A;TRIM21;TRIM8;VPS18;VPS37B;WWP2;ZYX
GO:0051091	positive regulation of sequence-specific DNA binding transcription factor activity	16	7.12	0.0431674	ADAM8;AKT1;IKBKG;NFAM1;PRKCZ;PRKD2;PYCARD;RBCK1;RELA;S100A9;TAF12;TGFB1;TLR4;TRAF6;TRIM21;TRIM8
GO:0038123	toll-like receptor TLR1:TLR2 signaling pathway	8	2.33	0.0431872	IKBKG;MAPK1;MAPKAPK2;MYD88;RELA;RPS6KA1;TLR4;TRAF6
GO:0038124	toll-like receptor TLR6:TLR2 signaling pathway	8	2.33	0.0431872	IKBKG;MAPK1;MAPKAPK2;MYD88;RELA;RPS6KA1;TLR4;TRAF6
GO:0050708	regulation of protein secretion	22	11.26	0.043333	ADAM8;ADRA2A;CACNA1D;CSF1R;FCN1;FGR;HLA-E;IL4R;LILRB1;MARCKS;NLRP12;NR1H2;PRKACA;PRKCZ;PYCARD;RAB11FIP1;RHBDF2;SYK;TGFB1;TLR4;TNFRSF9;TRAF6
GO:0070665	positive regulation of leukocyte proliferation	11	4	0.0439459	CD59;CD74;CORO1A;HLA-E;LILRB2;PYCARD;SASH3;SYK;TLR4;TRAF6;VAV3
GO:0051090	regulation of sequence-specific DNA binding transcription factor activity	22	11.32	0.0463591	ADAM8;AKT1;ARRB2;HCK;IKBKG;MAPK1;NFAM1;NLRP12;PRKCZ;PRKD2;PYCARD;RBCK1;RELA;S100A9;SYK;TAF12;TGFB1;TLR4;TRAF6;TRIM21;TRIM8;WWP2
GO:0009653	anatomical structure morphogenesis	105	80.8	0.0464004	ACTB;ADAM8;ALDOA;APH1B;ARAP1;ARG1;ARHGEF11;ATP6V0D1;BASP1;BCR;BNC2;BRCA1;CACNA1D;CDC42EP4;CDH2;CEACAM1;CEBPB;CNTNAP1;CORO1A;CSF1R;CSF3R;CSNK1D;CST3;DLG3;EPHB6;ERBB2;FES;FGR;FMNL1;GAS7;GCM1;GLIPR2;GRB2;HCK;HOXB7;HPSE;IFT80;IL1RN;ILK;KDM6B;LMO4;LST1;MAP1S;MAPK1;MARK2;MBOAT7;MMP9;MYH9;MYO9B;NCAM1;NCOA1;NFIC;NINJ1;OPA3;PARVB;PEAK1;PFN1;PITPNA;PLXNB2;POR;PREX1;PRKACA;PRKCZ;PRKD2;PSENEN;PTPN6;PXN;QKI;R…
GO:0044710	single-organism metabolic process	196	165.48	0.0468663	ABCG1;ACIN1;ACP6;ADAM8;ADAMTS2;ADIPOR2;ADRA2A;AKT1;ALDOA;ALOX5;AMPD2;APLP2;APOBR;ARG1;ARRB2;ARSB;ATG13;ATG2A;BAP1;BCKDK;BRCA1;C5AR1;CA4;CACNA1D;CAMKK2;CD300A;CD59;CD74;CDA;CDH2;CEBPA;CFD;CFP;CHST15;CLSPN;CPT2;CSF1R;CSNK1D;CST3;CTSD;CXCR1;CYBA;CYP4F2;DGAT1;DGAT2;DGKK;DHRS7B;DLG3;ERBB2;FCN1;FGR;FPR1;G6PD;GALNT2;GAPDH;GLIPR2;GMIP;GMPR2;GNAI2;GNB2;GNG2;GPX3;GRB2;H2AFY;HAL;HCK;HELZ2;HGS;HK3;HPSE;HSD17…
GO:0010959	regulation of metal ion transport	19	9.26	0.0483362	ACTN4;ADRA2A;AKT1;ARRB2;BEST1;CACNA1D;CAMK2G;CORO1A;CYBA;GNAI2;LILRB1;LILRB2;P2RX1;PRKACA;PTPN6;SLC9A1;SLC9A3R1;TGFB1;WWP2
GO:0045670	regulation of osteoclast differentiation	7	1.87	0.0483362	CEBPB;LILRB1;LILRB3;TFE3;TLR4;TRAF6;TYROBP
GO:0032736	positive regulation of interleukin-13 production	3	0.3	0.0483362	HLA-E;PRKCZ;RARA
GO:0043312	neutrophil degranulation	3	0.3	0.0483362	BCR;MYO1F;SYK
GO:0045589	regulation of regulatory T cell differentiation	3	0.3	0.0483362	HLA-G;IRF1;LILRB2
GO:0045628	regulation of T-helper 2 cell differentiation	3	0.3	0.0483362	IL4R;PRKCZ;RARA
GO:0060670	branching involved in labyrinthine layer morphogenesis	3	0.3	0.0483362	GCM1;GRB2;SPINT1
GO:0090196	regulation of chemokine secretion	3	0.3	0.0483362	CSF1R;IL4R;PYCARD
GO:0001892	embryonic placenta development	9	2.92	0.0483362	AKT1;CEBPA;CEBPB;GCM1;GRB2;MAPK1;NCOA1;SPINT1;TFEB
GO:0010562	positive regulation of phosphorus metabolic process	48	31.61	0.0483362	ADAM8;ADRA2A;AKT1;ARRB2;ATP6V0D1;C5AR1;CD300A;CD74;CDH2;CLSPN;CSF1R;CSNK1D;ERBB2;FGR;FPR1;GLIPR2;GNAI2;HCLS1;IKBKG;IL1RN;ILK;MAP3K11;MAP3K3;MAPK1;MAPKAPK2;MAPRE3;MARK2;MMP9;PLAUR;PPP1R15A;PRKACA;PRKCD;PRKCZ;PRKD2;PXN;PYCARD;RAF1;RARA;SCIMP;SLC11A1;SYK;TGFB1;TIMP2;TLR4;TNFRSF1A;TRAF6;VAV3;VRK3
GO:0045937	positive regulation of phosphorus metabolic process	48	31.61	0.0483362	ADAM8;ADRA2A;AKT1;ARRB2;ATP6V0D1;C5AR1;CD300A;CD74;CDH2;CLSPN;CSF1R;CSNK1D;ERBB2;FGR;FPR1;GLIPR2;GNAI2;HCLS1;IKBKG;IL1RN;ILK;MAP3K11;MAP3K3;MAPK1;MAPKAPK2;MAPRE3;MARK2;MMP9;PLAUR;PPP1R15A;PRKACA;PRKCD;PRKCZ;PRKD2;PXN;PYCARD;RAF1;RARA;SCIMP;SLC11A1;SYK;TGFB1;TIMP2;TLR4;TNFRSF1A;TRAF6;VAV3;VRK3
GO:0048585	negative regulation of response to stimulus	59	40.76	0.0484445	ADRA2A;AKT1;ARHGEF11;ARRB2;BCR;BRCA1;C10orf54;CD300A;CD59;CD74;CDH2;CYP4F2;GRB2;HGS;HLA-B;HLA-E;HLA-G;IFT80;IKBKG;IL1RN;IL4R;KCTD13;LEMD2;LILRB1;LILRB2;METRNL;MGRN1;MKL1;MMP9;MNT;MYH9;NLRP12;NR1H2;PGLYRP1;PLAUR;PPP1R15A;PRKACA;PRKCD;PRKCZ;PSMB3;PSMD13;PTPN6;PYCARD;RAF1;RELA;RGS3;RNF169;SLC9A3R1;TGFB1;THBD;TIMP2;TLR4;TMEM127;TNFRSF1A;TNFRSF1B;TNFSF14;TRAFD1;VRK3;WWC3
GO:0031343	positive regulation of cell killing	6	1.41	0.0496307	HLA-B;HLA-C;HLA-E;HLA-F;HLA-G;LAMP1
GO:0038083	peptidyl-tyrosine autophosphorylation	6	1.41	0.0496307	BMX;FES;FGR;HCK;SYK;TYK2
Up-regulated molecular function in PD
GO:0016772	transferase activity, transferring phosphorus-containing groups	51	29.59	0.0117172	AKT1;BCKDK;BCR;BMX;CAMK2G;CAMKK2;CHRAC1;CSF1R;CSNK1D;DAPK2;DGKG;DGKK;DLG3;DMPK;EPHB6;ERBB2;FES;FGR;HCK;HK3;IGF2R;ILK;MAP3K11;MAP3K3;MAPK1;MAPKAPK2;MARK2;MAST3;NADK;PCYT1A;PDK3;PEAK1;PHKG2;PNKP;PPP4C;PRKACA;PRKCD;PRKCZ;PRKD2;PRKY;RAF1;RPS6KA1;SCYL1;SIK3;STK10;STK40;SYK;TK2;TTN;TYK2;VRK3
GO:0004715	non-membrane spanning protein tyrosine kinase activity	8	1.5	0.0117172	BMX;FES;FGR;HCK;PEAK1;PRKCD;SYK;TYK2
GO:0032393	MHC class I receptor activity	4	0.29	0.0130274	KIR3DL1;KIR3DS1;LILRB1;LILRB2
GO:0032396	inhibitory MHC class I receptor activity	3	0.13	0.0135459	KIR3DL1;LILRB1;LILRB2
GO:0005088	Ras guanyl-nucleotide exchange factor activity	13	4.14	0.0249473	ARHGEF11;ARHGEF40;BCR;DENND3;DNMBP;PLEKHG3;PREX1;RASGRP4;RIN3;SBF1;TRAPPC1;VAV1;VAV3
GO:0032403	protein complex binding	47	27.76	0.0272066	ACTB;ACTN1;ACTN4;ADAM23;ADRA2A;ARRB2;ATP6V0D1;CD74;CEBPA;CLSPN;CORO1A;DOK3;DST;FCAR;FCER1G;FCGRT;FGR;FMNL1;GAPDH;GAS7;GNAI2;GNB2;H2AFY;HCLS1;ICAM3;ILK;KATNB1;KIF1B;MAP1S;MAPRE3;MARCKS;MMP9;MYH9;MYO9B;NCOA1;PXN;RELA;RNF169;RNF40;S100A9;SLC9A3R1;SNX1;SYK;TIMP2;TNFRSF1A;TPGS1;TTN
GO:0005102	receptor binding	66	43.7	0.0421107	ACTN1;ACTN4;ADAM23;ADRA2A;ARAP1;ARHGEF11;ARRB2;BRCA1;CD74;CEBPB;CMTM3;CNPY3;CXCL16;DLG3;DOK3;DST;ELMO2;ERBB2;FCN1;FES;FGR;FLOT2;FPR1;GAB2;GNAI2;GRB2;GRN;HCK;HLA-B;HLA-C;HLA-E;HLA-F;HLA-G;ICAM3;IKBKG;IL16;IL1RN;ILK;JUND;LILRB1;LILRB2;METRNL;MYD88;NCOA1;NR1H2;PFN1;PLAUR;PXN;RARA;S100A4;S100A9;SELPLG;SH2B2;SLC9A3R1;SNX1;SYK;TADA3;TGFB1;TIMP2;TNFSF14;TRAF6;TYK2;TYMP;TYROBP;VAV3;VDR
Up-regulated cellular component in PD
GO:0098588	bounding membrane of organelle	99	68.75	0.00277091	ABCG1;ADAM8;AGTRAP;AP1M1;ARAP1;ATG2A;ATP6V0D1;CA4;CAMK2G;CANT1;CBFA2T3;CD74;CHST15;CKAP4;CLCN4;CLTB;CORO1A;CYBA;CYP4F2;DGAT1;DGAT2;DHRS7B;DIRC2;DMPK;DNAJC5;DST;ERBB2;ERGIC1;FKBP9;FLOT2;GALNT2;GLIPR2;GNB2;GOLGA2;HGS;HLA-B;HLA-C;HLA-E;HLA-F;HLA-G;HPSE;IFITM3;IGF2R;LAMP1;LAMP2;LAPTM5;LGR6;LST1;MAN2A2;MBOAT7;MGAT1;MRVI1;MVB12A;MYD88;NCAM1;NCF4;NEU1;NRROS;OS9;PCYT1A;PLAUR;PLEKHF1;PLIN3;PLOD1;POR;PPP1R…
GO:0030659	cytoplasmic vesicle membrane	28	12.94	0.00295751	ADAM8;AGTRAP;AP1M1;ATP6V0D1;CA4;CAMK2G;CD74;CLTB;CORO1A;CYBA;DNAJC5;DYSF;FLOT2;HLA-B;HLA-C;HLA-E;HLA-F;HLA-G;KIF1B;LAMP1;LAMP2;RAB11FIP1;RAB37;RAB3D;RAB43;SCYL1;SLC11A1;TCIRG1
GO:0030133	transport vesicle	16	5.44	0.00295751	APH1B;CA4;CD74;CLTB;GOLGA2;HCK;HLA-B;HLA-C;HLA-E;HLA-F;HLA-G;IGF2R;RAB3D;SIPA1;YIPF1;YIPF3
GO:0044194	cytolytic granule	3	0.13	0.00313516	LAMP1;PRF1;RNF19B
GO:0005938	cell cortex	18	6.68	0.00335489	ACTB;ACTN1;ACTN4;AGTRAP;CORO1A;DST;FMNL1;MARCKS;MARK2;MYH9;MYO1F;MYO9B;PRKCZ;PSTPIP1;PXN;TNFAIP2;TPM3;TRAF6
GO:0005773	vacuole	34	17.29	0.00349888	ADAM8;AP1M1;ARSB;ATP6V0D1;CD74;CTSD;DAPK2;DIRC2;DNAJC5;GNB2;HCK;HPSE;IDS;IFITM3;IGF2R;LAMP1;LAMP2;LAPTM5;LAT2;NAGA;NCF1;NCF4;NEU1;PLBD1;PLEKHF1;PRF1;PSAP;RAB24;RNF19B;SLC11A1;SLC15A3;SLC44A2;TCIRG1;VPS18
GO:0042611	MHC protein complex	6	0.86	0.00397025	CD74;HLA-B;HLA-C;HLA-E;HLA-F;HLA-G
GO:0071556	integral component of lumenal side of endoplasmic reticulum membrane	6	0.89	0.00464001	CD74;HLA-B;HLA-C;HLA-E;HLA-F;HLA-G
GO:0098553	lumenal side of endoplasmic reticulum membrane	6	0.89	0.00464001	CD74;HLA-B;HLA-C;HLA-E;HLA-F;HLA-G
GO:0098576	lumenal side of membrane	6	0.89	0.00464001	CD74;HLA-B;HLA-C;HLA-E;HLA-F;HLA-G
GO:0044459	plasma membrane part	105	75.33	0.00472156	ABCG1;ADAM23;ADAM8;ADGRE2;ADGRE5;ADRA2A;ARRB2;ATP6V0D1;BCR;BEST1;BMX;C10orf54;C5AR1;CA4;CACNA1D;CD59;CD74;CDH2;CEACAM1;CLTB;CNTNAP1;CORO1A;CSF1R;CSF3R;CYBA;CYP4F2;DLG3;DST;DYSF;EPHB6;ERBB2;FCAR;FCER1G;FCN1;FES;FGR;FLOT2;G6PD;GNAI2;GNG2;GRB2;HCK;HLA-B;HLA-C;HLA-E;HLA-F;HLA-G;ICAM3;IGF2R;IL17RA;IL4R;ITGAM;KCNMB1;KIR2DL1;KIR2DL3;KIR2DL4;KIR2DS3;KIR2DS4;KIR3DL1;KIR3DS1;LAMP1;LAPTM5;LGR6;LILRB1;LILRB2…
GO:0044422	organelle part	287	245.9	0.00484313	ABCG1;ABTB1;ACIN1;ACTB;ACTN1;ACTN4;ADAM8;AGTRAP;AKT1;ALDOA;ALOX5;AP1M1;ARAP1;ARSB;ATG2A;ATP6V0D1;BAP1;BASP1;BCKDK;BNC2;BOD1L1;BRCA1;CA4;CACNA1D;CAMK2G;CANT1;CBFA2T3;CD74;CEBPA;CEBPB;CES2;CFD;CFP;CHRAC1;CHST15;CIRBP;CKAP4;CLCN4;CLSPN;CLTB;CMTM3;CNPY3;CORO1A;COTL1;CPT2;CSNK1D;CTSD;CYBA;CYP4F2;DAPK2;DGAT1;DGAT2;DHRS7B;DHX8;DIRC2;DMPK;DNAJC5;DNMBP;DST;DYSF;ELL;ENC1;ERBB2;ERGIC1;ETV6;FGR;FKBP9;FLII;FL…
GO:0048471	perinuclear region of cytoplasm	35	18.5	0.00512465	ACTN4;CA4;CKAP4;CSNK1D;CYBA;DGAT2;ERBB2;FLOT2;GALNT2;GAPDH;GNB2;IGF2R;MAP1S;MAPRE3;MRVI1;MTMR14;MVP;MYO9B;NMRAL1;PLEKHF1;PREX1;PRKCD;PRKCZ;PSTPIP1;PTGDS;RARA;S100A4;S100A6;SIPA1;SLC9A1;STX10;TLR4;TNFRSF1B;TPD52L2;TRAF6
GO:0001726	ruffle	14	4.83	0.0073831	ACTN1;ADGRE2;BMX;FGR;GAS7;MTMR14;MYH9;MYO9B;PDLIM7;S100A11;S100A6;SH2B2;SLC9A3R1;WIPF1
GO:0005765	lysosomal membrane	19	7.85	0.0073831	AP1M1;ATP6V0D1;CD74;DIRC2;DNAJC5;GNB2;HPSE;IFITM3;IGF2R;LAMP1;LAMP2;LAPTM5;NEU1;PLEKHF1;PSAP;SLC15A3;SLC44A2;TCIRG1;VPS18
GO:0005856	cytoskeleton	86	60.17	0.00805713	ACTB;ACTN1;ACTN4;ADAM8;AKT1;ALDOA;ARHGAP26;ATP6V0D1;BASP1;BRCA1;CDC42EP4;CKAP4;CORO1A;COTL1;CSNK1D;DNMBP;DST;ELMO2;ENC1;FES;FGR;FLII;G6PD;GAPDH;GAS7;GNAI2;HCK;HSPA6;IFT80;IKBKG;ILK;KATNB1;KIF1B;KLHL21;LSP1;MAP1S;MAP3K11;MAP7D1;MAPK1;MAPKAPK2;MAPRE3;MARCKS;MARK2;MID1IP1;MSRB1;MVB12A;MVP;MYH9;MYO1F;MYO7B;MYO9B;NSFL1C;PARVB;PARVG;PBXIP1;PDLIM7;PEAK1;PFN1;POTEKP;PPP1R18;PPP4C;PRKACA;PRKCZ;PSMB3;PSTPI…
GO:0044448	cell cortex part	11	3.27	0.00847211	ACTB;ACTN1;ACTN4;CORO1A;MARK2;MYH9;MYO1F;PRKCZ;PSTPIP1;TNFAIP2;TPM3
GO:0031090	organelle membrane	121	91.23	0.00958027	ABCG1;ADAM8;AGTRAP;ALOX5;AP1M1;ARAP1;ATG2A;ATP6V0D1;CA4;CAMK2G;CANT1;CBFA2T3;CD74;CHST15;CKAP4;CLCN4;CLTB;CMTM3;CORO1A;COTL1;CPT2;CYBA;CYP4F2;DGAT1;DGAT2;DHRS7B;DIRC2;DMPK;DNAJC5;DST;DYSF;ERBB2;ERGIC1;FGR;FKBP9;FLOT2;GALNT2;GAPDH;GLIPR2;GNB2;GOLGA2;GRB2;HGS;HLA-B;HLA-C;HLA-E;HLA-F;HLA-G;HPSE;HSD17B1;IDH2;IFITM3;IGF2R;KIF1B;LAMP1;LAMP2;LAPTM5;LEMD2;LETM2;LGR6;LST1;MAN2A2;MBOAT7;MGAT1;MICU1;MRVI1;M…
GO:0042995	cell projection	73	50.13	0.0130933	ACTB;ACTN1;ACTN4;ADGRE2;AKT1;ARG1;ARRB2;ATP6V0D1;BASP1;BMX;CA4;CAMKK2;CDH2;CLTB;CNTNAP1;CORO1A;CYBA;DLG3;DST;DYSF;FGR;FMNL1;GAS7;HCK;IFT80;ILK;KATNB1;KIF1B;LAMP1;MAP1S;MAPK1;MTMR14;MYH9;MYO9B;NCF1;NCOA1;ORAI2;P2RX1;PARVB;PDLIM7;PFN1;PLAUR;PREX1;PRKACA;PRKCZ;PSTPIP1;PXN;RAC2;RAF1;RARA;RILPL1;RNF40;ROPN1L;RPGRIP1;S100A11;S100A4;S100A6;SCIMP;SETX;SH2B2;SLC9A1;SLC9A3R1;SNX1;SSH1;STARD10;TGFB1;TIMP2;T…
GO:0005769	early endosome	19	8.33	0.0139891	ATP6V0D1;CLCN4;CORO1A;DYSF;HGS;HLA-B;HLA-C;HLA-E;HLA-F;HLA-G;MAPK1;MGRN1;RHOB;RIN3;SNX1;TMEM127;TMEM163;TOM1;VPS18
GO:0098552	side of membrane	21	9.66	0.0139891	ABCG1;C10orf54;CA4;CD59;CD74;FCER1G;FCN1;G6PD;HLA-B;HLA-C;HLA-E;HLA-F;HLA-G;ITGAM;LAMP1;LILRB1;NCAM1;P2RX1;TLR4;TNFRSF9;TRAF6
GO:0044424	intracellular part	446	414.37	0.0151853	ABCG1;ABTB1;ACIN1;ACP6;ACTB;ACTN1;ACTN4;ADAM8;ADRA2A;AGTRAP;AKNA;AKT1;ALDOA;ALOX5;AMPD2;AP1M1;APH1B;APLP2;ARAP1;AREL1;ARG1;ARHGAP26;ARHGAP27;ARHGAP30;ARHGAP9;ARHGEF11;ARHGEF40;ARRB2;ARSB;ASB6;ASMTL;ATG13;ATG2A;ATP6V0D1;BAP1;BASP1;BCKDK;BCR;BEST1;BMX;BNC2;BOD1L1;BRCA1;C15orf39;C5AR1;CA4;CACNA1D;CAMK2G;CAMKK2;CANT1;CAPN1;CBFA2T3;CD209;CD74;CDA;CDC42EP4;CEBPA;CEBPB;CES2;CFD;CFP;CHRAC1;CHST15;CIRBP;C…
GO:0005623	cell	513	490.03	0.015785	ABCG1;ABTB1;ACIN1;ACP6;ACTB;ACTN1;ACTN4;ADAM23;ADAM8;ADGRE2;ADGRE5;ADGRG3;ADIPOR2;ADRA2A;AGTRAP;AKNA;AKT1;ALDOA;ALOX5;AMPD2;AP1M1;APH1B;APLP2;APMAP;APOBR;ARAP1;AREL1;ARG1;ARHGAP26;ARHGAP27;ARHGAP30;ARHGAP9;ARHGEF11;ARHGEF40;ARRB2;ARSB;ASB6;ASMTL;ATG13;ATG2A;ATP6V0D1;BAP1;BASP1;BCKDK;BCR;BEST1;BMX;BNC2;BOD1L1;BRCA1;C10orf54;C15orf39;C5AR1;CA4;CACNA1D;CAMK2G;CAMKK2;CANT1;CAPN1;CBFA2T3;CD101;CD209;C…
GO:0044464	cell part	513	490.03	0.015785	ABCG1;ABTB1;ACIN1;ACP6;ACTB;ACTN1;ACTN4;ADAM23;ADAM8;ADGRE2;ADGRE5;ADGRG3;ADIPOR2;ADRA2A;AGTRAP;AKNA;AKT1;ALDOA;ALOX5;AMPD2;AP1M1;APH1B;APLP2;APMAP;APOBR;ARAP1;AREL1;ARG1;ARHGAP26;ARHGAP27;ARHGAP30;ARHGAP9;ARHGEF11;ARHGEF40;ARRB2;ARSB;ASB6;ASMTL;ATG13;ATG2A;ATP6V0D1;BAP1;BASP1;BCKDK;BCR;BEST1;BMX;BNC2;BOD1L1;BRCA1;C10orf54;C15orf39;C5AR1;CA4;CACNA1D;CAMK2G;CAMKK2;CANT1;CAPN1;CBFA2T3;CD101;CD209;C…
GO:0005576	extracellular region	174	141.58	0.0169974	ACTB;ACTN1;ACTN4;ADAM23;ADAMTS2;ADGRE5;ALDOA;ALOX5;AP1M1;APLP2;APMAP;APOBR;ARG1;ARSB;ATP6V0D1;BASP1;BCR;CA4;CANT1;CAPN1;CD101;CD209;CD300A;CD59;CD74;CDA;CDH2;CEACAM1;CES2;CFD;CFP;CKAP4;CMTM3;CORO1A;COTL1;CSF3R;CST3;CST4;CST7;CTDSP1;CTSD;CXCL16;DLG3;DNAJC5;DST;DYSF;EPHB6;FAM131A;FCAR;FCN1;FGR;FLOT2;FMNL1;G6PD;GALNT2;GAPDH;GLIPR2;GNAI2;GNB2;GNG2;GNLY;GPX3;GRB2;GRN;H2AFY;HAVCR2;HGS;HLA-B;HLA-C;HLA-E…
GO:0005622	intracellular	449	418.22	0.0173409	ABCG1;ABTB1;ACIN1;ACP6;ACTB;ACTN1;ACTN4;ADAM8;ADRA2A;AGTRAP;AKNA;AKT1;ALDOA;ALOX5;AMPD2;AP1M1;APH1B;APLP2;ARAP1;AREL1;ARG1;ARHGAP26;ARHGAP27;ARHGAP30;ARHGAP9;ARHGEF11;ARHGEF40;ARRB2;ARSB;ASB6;ASMTL;ATG13;ATG2A;ATP6V0D1;BAP1;BASP1;BCKDK;BCR;BEST1;BMX;BNC2;BOD1L1;BRCA1;C15orf39;C5AR1;CA4;CACNA1D;CAMK2G;CAMKK2;CANT1;CAPN1;CBFA2T3;CD209;CD74;CDA;CDC42EP4;CEBPA;CEBPB;CES2;CFD;CFP;CHRAC1;CHST15;CIRBP;C…
GO:0030134	ER to Golgi transport vesicle	7	1.65	0.0206137	CD74;GOLGA2;HLA-B;HLA-C;HLA-E;HLA-F;HLA-G
GO:0044437	vacuolar part	23	11.51	0.0222292	AP1M1;ARSB;ATP6V0D1;CD74;CTSD;DAPK2;DIRC2;DNAJC5;GNB2;HPSE;IDS;IFITM3;IGF2R;LAMP1;LAMP2;LAPTM5;NEU1;PLEKHF1;PSAP;SLC15A3;SLC44A2;TCIRG1;VPS18
GO:0031143	pseudopodium	4	0.51	0.0222292	ACTN1;ACTN4;MAPK1;RAF1
GO:0005770	late endosome	15	6.26	0.0261587	CD74;CLCN4;DYSF;HGS;IFITM3;IGF2R;LAMP1;LAMP2;MAPK1;MVB12A;RHOB;SLC11A1;SLC31A1;VPS18;VPS37B
GO:0012507	ER to Golgi transport vesicle membrane	6	1.34	0.0317616	CD74;HLA-B;HLA-C;HLA-E;HLA-F;HLA-G
GO:0030863	cortical cytoskeleton	8	2.32	0.0341727	ACTB;ACTN1;ACTN4;CORO1A;MYH9;MYO1F;PSTPIP1;TPM3
GO:0043227	membrane-bounded organelle	399	367.65	0.0350391	ABCG1;ABTB1;ACIN1;ACP6;ACTB;ACTN1;ACTN4;ADAM8;ADGRE5;AGTRAP;AKNA;AKT1;ALDOA;ALOX5;AP1M1;APH1B;APLP2;APMAP;ARAP1;AREL1;ARG1;ARHGAP30;ARRB2;ARSB;ATG13;ATG2A;ATP6V0D1;BAP1;BASP1;BCKDK;BCR;BNC2;BOD1L1;BRCA1;C5AR1;CA4;CAMK2G;CAMKK2;CANT1;CAPN1;CBFA2T3;CD101;CD209;CD300A;CD59;CD74;CDH2;CEACAM1;CEBPA;CEBPB;CES2;CFD;CFP;CHRAC1;CHST15;CIRBP;CKAP4;CLCN4;CLSPN;CLTB;CMIP;CMTM3;CNPY3;CORO1A;COTL1;CPT2;CSNK1D;…
GO:0001931	uropod	3	0.29	0.0352059	MYH9;PSTPIP1;SCIMP
GO:0031254	cell trailing edge	3	0.29	0.0352059	MYH9;PSTPIP1;SCIMP
GO:0005774	vacuolar membrane	19	9.22	0.0362999	AP1M1;ATP6V0D1;CD74;DIRC2;DNAJC5;GNB2;HPSE;IFITM3;IGF2R;LAMP1;LAMP2;LAPTM5;NEU1;PLEKHF1;PSAP;SLC15A3;SLC44A2;TCIRG1;VPS18
GO:1902494	catalytic complex	44	28.39	0.0393094	ACTB;ATG13;BCKDK;BRCA1;CHRAC1;CYBA;ENC1;GMPR2;GNAI2;GNG2;GTF2F1;H2AFY;IKBKG;INTS12;JARID2;KCTD13;KLHL21;KMT2D;NACC2;NCF1;NCF4;NDUFS2;OS9;PHC2;PHF12;PHKG2;PPP1R10;PPP1R15A;PPP4C;PRKACA;PRMT5;PYCARD;RBCK1;RERE;RNF40;RTF1;SLC9A1;SPTLC2;TADA3;TAF12;TRIM21;TRPC4AP;TSEN34;WWP2
GO:0032154	cleavage furrow	6	1.43	0.0410592	MYH9;PSTPIP1;RAB11FIP4;RHOB;SSH1;TPM3
GO:0097610	cell surface furrow	6	1.43	0.0410592	MYH9;PSTPIP1;RAB11FIP4;RHOB;SSH1;TPM3
GO:0019898	extrinsic component of membrane	16	7.31	0.0410592	ATG2A;BMX;CDH2;FCN1;FES;FGR;GNAI2;GNG2;HCK;MTMR3;NCF1;PLAUR;S100A6;SNX1;SYK;TYK2
GO:0005775	vacuolar lumen	8	2.45	0.0427778	ARSB;CD74;CTSD;DAPK2;HPSE;IDS;NEU1;PSAP
GO:0019897	extrinsic component of plasma membrane	11	4.16	0.0429989	BMX;CDH2;FCN1;FES;FGR;GNAI2;GNG2;HCK;S100A6;SYK;TYK2
GO:0031234	extrinsic component of cytoplasmic side of plasma membrane	9	3.02	0.0440321	BMX;FES;FGR;GNAI2;GNG2;HCK;S100A6;SYK;TYK2
GO:0043020	NADPH oxidase complex	3	0.32	0.0440321	CYBA;NCF1;NCF4
GO:0030027	lamellipodium	12	4.86	0.0482663	CDH2;CORO1A;DYSF;ILK;MYO9B;PARVB;PSTPIP1;PXN;RAC2;SLC9A1;SNX1;SSH1
Down-regulated biological process in PD
None
Down-regulated molecular function in PD
None
Down-regulated cellular component in PD
None
